1 **Visualizing cellular and tissue ultrastructure using Ten-fold Robust Expansion Microscopy**  
2 **(TREx)**

3 Hugo G.J. Damstra<sup>1</sup>, Boaz Mohar<sup>2</sup>, Mark Eddison<sup>2</sup>, Anna Akhmanova<sup>1</sup>, Lukas C. Kapitein<sup>1\*</sup>, Paul W.  
4 Tillberg<sup>2\*</sup>

5 <sup>1</sup>Cell Biology, Neurobiology and Biophysics, Department of Biology, Faculty of Science, Utrecht  
6 University, Utrecht, The Netherlands

7 <sup>2</sup>Janelia Research Campus, HHMI, Ashburn, Virginia 20147, USA

8 Correspondence: [l.kapitein@uu.nl](mailto:l.kapitein@uu.nl); [tillbergp@janelia.hhmi.org](mailto:tillbergp@janelia.hhmi.org)

## 9 **ABSTRACT**

10 Expansion microscopy (ExM) is a powerful technique to overcome the diffraction limit of light microscopy  
11 that can be applied in both tissues and cells. In ExM, samples are embedded in a swellable polymer gel to  
12 physically expand the sample and isotropically increase resolution in x, y and z. The maximum resolution  
13 increase is limited by the expansion factor of the gel, which is four-fold for the original ExM protocol.  
14 Variations on the original ExM method have been reported that allow for greater expansion factors but at  
15 the cost of ease of adoption or versatility. Here, we systematically explore the ExM recipe space and present  
16 a novel method termed Ten-fold Robust Expansion Microscopy (TREx) that, like the original ExM method,  
17 requires no specialized equipment or procedures. We demonstrate that TREx gels expand ten-fold, can be  
18 handled easily, and can be applied to both thick mouse brain tissue sections and cultured human cells  
19 enabling high-resolution subcellular imaging with a single expansion step. Furthermore, we show that  
20 TREx can provide ultrastructural context to subcellular protein localization by combining antibody-stained  
21 samples with off-the-shelf small molecule stains for both total protein and membranes.

## 22 INTRODUCTION

23 Expansion Microscopy (ExM) circumvents the diffraction limit of light microscopy by physically  
24 expanding the specimen four-fold in each dimension (F. Chen, Tillberg, & Boyden, 2015; Tillberg et al.,  
25 2016). Expansion is achieved by chemically anchoring proteins and other biomolecules directly to a hyper-  
26 swelling gel, followed by aggressive proteolysis to enable uniform swelling of the gel material. While other  
27 super-resolution approaches are not readily compatible with thick tissue slices and require specialized optics  
28 (Hell & Wichmann, 1994), fluorophores (Rust, Bates, & Zhuang, 2006), or software (Gustafsson, 2000),  
29 ExM is compatible with any microscope (R. Gao et al., 2019; Zhang et al., 2016), including other super  
30 resolution modalities (M. Gao et al., 2018; Halpern, Alas, Chozinski, Paredez, & Vaughan, 2017; Xu et al.,  
31 2019), and performs well in both cultured cells and thick tissue slices (F. Chen et al., 2015; Tillberg et al.,  
32 2016). Assuming sufficiently high labeling density, the resolution increase of ExM depends on the  
33 expansion factor of the gel recipe used. Recently, ExM variants have been described that seek to improve  
34 resolution by increasing the expansion factor. For example, iterative ExM (iExM) uses sequential  
35 embedding in multiple expansion gels to achieve 15x and greater expansion but requires a complex  
36 sequence of gel re-embedding, link cleaving, and fluorophore transfer (Chang et al., 2017), limiting its  
37 broad adoption.

38 The expansion factor of the gel itself can be improved by decreasing the concentration of  
39 crosslinker (Okay, 2009), usually bisacrylamide (bis), although this is generally at the expense of the  
40 mechanical integrity of the gel. For example, reducing the bis concentration in the original ExM recipe  
41 from 1.5 to 0.25 ppt (parts per thousand) produces a ~9-fold expanding gel (Chen, Tillberg and Boyden,  
42 2015, SF5), but these gels are too soft to hold their shape under the force of gravity. As a result, they are  
43 difficult to handle without breaking and display non-uniform expansion. This tradeoff of expansion versus  
44 gel mechanical integrity has not been explored in a quantitative or systematic way.

45 Another gel recipe variant, using a high concentration of the monomer dimethylacrylamide  
46 (DMAA), has enough crosslinking through side reactions and polymer chain entanglement that the  
47 crosslinker can be omitted entirely, producing ~10-fold expansion in one step (Truckenbrodt et al., 2018).  
48 This recipe has been used to expand cultured cells and thin cryosectioned tissue (Truckenbrodt, Sommer,  
49 Rizzoli, & Danzl, 2019), but reportedly requires rigorous degassing to remove oxygen prior to gelation,  
50 making it laborious to use. Moreover, expansion of thick tissue slices (>50  $\mu\text{m}$ ) has not been demonstrated  
51 using this method. Thus, a robustly validated and easily adoptable method that is compatible with multiple  
52 sample types and enables single step expansion well over 4x without compromising gel integrity is lacking.

53 Here, we explored the expansion gel recipe space in a systematic manner, assessing the limits of  
54 single-round expansion using reagents and methods that would be familiar to labs already performing ExM.  
55 For any given choice of recipe parameters (monomer concentrations, gelation temperature, initiator  
56 concentration, etc.), varying the crosslinker alone yielded a family of recipes whose expansion factor and  
57 mechanical quality vary smoothly from high expanding, mechanically unstable to low expanding, tough  
58 gels. A range of crosslinker concentrations was tested for each family because the optimal crosslinker  
59 concentration may vary by family. From this exploration we generated TREx, an optimized ExM method  
60 that allows for robust ten-fold expansion in a single step. We show TREx can be used to expand thick tissue  
61 slices and adherent cells, and is compatible with antibodies and off-the-shelf small molecule stains for total  
62 protein and membranes. Together, we show that TREx enables 3D nanoscopic imaging of specific  
63 structures stained with antibodies in combination with cellular ultrastructure.

## 64 **RESULTS**

65 To systematically explore the expansion recipe space, we developed a streamlined approach for  
66 synthesizing dozens of gel recipes and characterizing their mechanical quality in parallel. For every set of  
67 gel recipe parameters (component concentrations and gelation temperature, listed in Fig. 1A) we define a  
68 recipe family as the set of recipes generated by varying the crosslinker (bisacrylamide) concentration. For  
69 each family, we tested five recipes with crosslinker concentrations log-spaced from 1000 to 10 ppm (parts  
70 per million, or  $\mu\text{g/mL}$ ), plus one with zero crosslinker. We also included the original ExM recipe, with  
71 0.15% (1500 ppm) crosslinker. For each recipe, we cast three gel specimens, expanded them fully in water,  
72 and measured the expansion factor (Fig. 1B). We found that resistance to deformation under the force of  
73 gravity was a good proxy for the more subjective judgement of ease of gel handling. We measured gel  
74 deformation by placing a semicircular punch from each gel upright on its curved edge and allowing the gel  
75 corners to deflect under the force of gravity. We defined the deformation index as the vertical displacement  
76 of each gel corner, divided by the gel radius (Fig. 1C), which ranges from 0 (for gels that do not deform) to  
77 1 (for gels that deform freely under their own weight). We manually calibrated this measurement, finding  
78 that deformation indices between 0 and 0.125 corresponded to gels with excellent ease of handling, 0.125  
79 to 0.25 corresponded to acceptable ease of handling, and anything higher than 0.25 was unacceptable. While  
80 not as theoretically informative as elastic modulus and yield strength measurements, this measurement can  
81 be repeated and extended to new gel recipes by any lab developing expansion methods, without access to  
82 specialized equipment. We plotted the deformation index for each gel as a function of its expansion factor  
83 (Fig. 1D) to directly assess the tradeoff between expansion and mechanical quality.

### 84 **Development of the TREx gel recipe**

85 We began by characterizing a recipe family generated from the original ExM recipe (family A).  
86 Consistent with (F. Chen et al., 2015), reducing the crosslinker to 300 ppm increased the expansion to ~9x,  
87 below which the gels fail to form consistently (Fig. 1B, purple). We next characterized a high-monomer  
88 recipe family (family B) inspired by the 4x-expanding Ultra-ExM recipe (Gambarotto et al., 2019).  
89 Gambarotto et al. found that a higher monomer concentration relative to the original ExM recipe was  
90 necessary for high fidelity preservation of the shape of centrioles. This was offset with a lower crosslinker  
91 (bisacrylamide) concentration of 0.1% (1000 ppm) to achieve 4x expansion. Indeed, for this high-monomer  
92 family of recipes, expansion as a function of crosslinker concentration was shifted leftward compared to  
93 standard ExM (Fig. 1B, blue). As the crosslinker was decreased below 30 ppm, the increase in expansion  
94 factor saturated around 11.5x. The deformation index versus expansion factor curve for the high monomer  
95 family ran below that for standard ExM, indicating that for a given expansion factor the high-monomer gel  
96 holds its shape better than the corresponding standard ExM gel (Fig. 1D, blue).

97 Compared with standard ExM, this high monomer family uses a higher concentration of radical  
98 initiator and accelerator to trigger polymerization (5 ppt each of APS and TEMED, versus 2 ppt in standard  
99 ExM). We found that this high initiation rate causes gels to form within minutes at room temperature.  
100 Because the rates of initiation and polymerization increase with temperature, it is likely that specimens are  
101 not fully equilibrating to the gelation temperature of 37 °C before the onset of gelation, introducing a  
102 potential source of experimental variability. This rapid gelation makes the gelation chamber assembly step  
103 more time sensitive and presents challenges for adapting the technique to thick tissue slices, as thick tissue  
104 slices require extra time for the gelation solution to diffuse throughout the sample prior to polymerization.  
105 Therefore, we also tested the same high monomer recipe family but with initiator and accelerator reduced  
106 to 1.5 ppt (family C). The expansion versus crosslinker curve for this family was similar to family B for  
107 high crosslinker concentrations but displayed a slightly greater slope. Unlike family B, the expansion factor  
108 did not saturate upon decreasing the crosslinker concentration. Instead, the expansion factor continued to  
109 increase to 13x expansion at 10 ppm crosslinker (Fig. 1B, red), with zero-crosslinker gels failing to form.  
110 Family C enables ten-fold expansion without sacrificing acceptable gel mechanical quality (30 ppm bis,  
111 Fig. 1D, red), and without the faster, less controlled gelation kinetics of family B.

112 The recipe families explored above (B, C) feature a high fraction of sodium acrylate relative to  
113 acrylamide. Acrylate drives expansion of the gel but comes in widely varying purity levels and, in some  
114 cases, causes tissue to shrink. This macroscopic tissue shrinkage is modest compared to the gel expansion  
115 but may not be uniform at all scales. We therefore tested an alternative recipe family (D) with higher  
116 acrylamide to acrylate ratio (2.1:1). Increasing the acrylamide to acrylate ratio did not change the expansion  
117 factors appreciably at a given crosslinker concentration, suggesting that the swelling effect of acrylate

118 saturates at high concentrations. At the maximum expansion factor of ~10, the deformation behavior was  
119 comparable to family C. We chose to proceed with family D due to its lower acrylate content.

120 We further tested an elevated gelation temperature of 50 °C (family E), in an attempt to increase  
121 the initiation rate without introducing premature gelation as seen in recipe family B. Compared to family  
122 D, the expansion factors were around 15% higher at 100 ppm (6x) and 300 ppm crosslinker (9x), but  
123 gelation failed at lower concentrations, leaving family D as the family with a higher maximum expansion  
124 factor (i.e., 10x at 30 ppm bis). The deformation versus expansion curve for family E was similar to the  
125 other high monomer recipe families (Fig. 1D, green), but was found to be sensitive to processing details,  
126 such as the gelation chamber construction and placement within the incubator. This suggests that premature  
127 gelation prior to equilibrating at the higher temperature reduces the replicability of this recipe family.

128 Considering all 5 recipe families, family B (high acrylate and high APS/TEMED) displayed the  
129 lowest deformation index for a given expansion factor. Family D (high acrylamide and low APS/TEMED)  
130 displayed similar performance, with the deformation index remaining well within the acceptable range for  
131 expansion factors up to 10. In handling high-expanding (>8x) gels from all recipe families, we found that  
132 while those from the standard ExM family (A) were extremely prone to fragmentation, those from any of  
133 the high monomer families could be handled more easily (and even dropped from a height of several feet)  
134 without breaking. Because the reduced initiator concentration of family D results in a slower and more  
135 controlled polymerization rate, and because we preferred a lower acrylate content, we chose this recipe  
136 family to proceed to biological specimen expansion. We found that the exact expansion factor varied for  
137 different specimens and gelation chamber geometries but could readily be adjusted by fine-tuning the  
138 crosslinker concentration. We thus recommend that users test gels with a range of crosslinker concentrations  
139 between 30 and 100 ppm to find a suitable recipe for their specimen preparation. We name the resulting  
140 method Ten-fold Robust Expansion (TREx) microscopy.

### 141 **Subcellular imaging of specific proteins and cellular ultrastructure in thick brain slices**

142 In electron microscopy, non-specific stains for proteins and membranes are commonly used to  
143 provide structural detail at high spatial resolution. Recently, the use of non-specific NHS ester protein stains  
144 and other small molecule probes has been combined with ExM (M'Saad & Bewersdorf, 2020; Mao et al.,  
145 2020; Yu et al., 2020). Expansion allows visualization of intracellular detail in such densely stained  
146 samples, which would otherwise be too crowded to lead to meaningful contrast. These applications have  
147 the promise to bring together the advantages of light microscopy (specific staining using antibodies and  
148 volumetric imaging) with the advantage of seeing cellular context typically provided by electron

149 microscopy. Because TREx reaches single-step expansion factors at which small-molecule stains are  
150 expected to be useful, we set out to explore this idea further.

151 We applied BODIPY-FL NHS dye (total protein stain; see Materials and Methods) after expansion  
152 with TREx to demonstrate total protein distribution in thick (100  $\mu\text{m}$ ) slices of mouse brain cortex (Fig.  
153 2A, Fig. 2—fig. supp. 1, and Fig. 2—supp. movie 1). The neuropil region outside the cell somas contained  
154 a rich profusion of fibers and structures visible in sharp relief. The nucleus of each cell was easily identified,  
155 with especially strong staining in nucleoli-like structures. Surrounding each nucleus, the nuclear envelope  
156 could be identified, with particularly dense total protein stain on the side facing the nucleus. The nuclear  
157 envelope was punctuated by heavily stained spots that span the envelope, consistent with nuclear pore  
158 complexes (Fig. 2A, inset). Within the cytosol, several organelles were marked by either heavy inner  
159 staining with a dim border or weak inner staining.

160 We attempted to optimize protein retention, according to the total protein stain intensity, by  
161 reducing both protein anchoring and proteolysis compared with the original ExM. We tested a range of  
162 anchoring strengths by varying the concentration of the acryloyl-X SE (AcX) anchoring molecule applied  
163 prior to gelation. This was done in combination with two reduced disruption methods: proteinase K applied  
164 at one tenth that of the original ExM method (Fig. 2—fig. supp. 1, top row), and a high-temperature,  
165 protease-free denaturation treatment (Gambarotto et al., 2019; Ku et al., 2016; Tillberg et al., 2016; Zwettler  
166 et al., 2020) similar to that employed in Western blotting (Fig. 2—fig. sup. 1, bottom row). The protease-  
167 free treatment enabled greater protein retention but at the cost of incomplete expansion. This could be offset  
168 through reduced AcX concentration, though this was not clearly superior to high AcX followed by  
169 proteolysis, indicating a general tradeoff between protein retention and gel expansion (see Materials and  
170 Methods). We chose a hybrid approach with moderate AcX anchoring and low concentration proteinase K  
171 digestion followed by high temperature denaturation to proceed.

172 We next tested whether antibodies, applied to the tissue using a standard immunofluorescence  
173 procedure before embedding, were also retained in the TREx gel. We stained mouse brain cortex tissue for  
174 Bassoon (a marker for both excitatory and inhibitory pre-synaptic active zones), Homer (a marker for the  
175 excitatory post-synaptic apparatus), and VGAT (a vesicular GABA transporter in the pre-synaptic  
176 compartments of inhibitory synapses). After staining and anchoring with AcX, tissue was expanded with  
177 TREx and imaged by light sheet microscopy. Numerous putative excitatory synapses were observed at high  
178 density, with clearly separated Bassoon and Homer pre- and post-synaptic staining (Fig. 2B-C and Fig. 2—  
179 supp. movie 2). Because of the excellent axial resolution, TREx allowed us to quantify the separation of  
180 Bassoon and Homer regardless of the angle of the synapse with respect to the imaging plane (Fig. 2D). We  
181 found an average separation of  $1.17 \mu\text{m} \pm 0.52 \mu\text{m}$  (mean  $\pm$  S.D., 583 synapses), which, when corrected

182 for expansion, is consistent with previous reports in cultured neurons that estimated the synapse separation  
183 between 90-130 nm (Glebov, Cox, Humphreys, & Burrone, 2016; Wiesner et al., 2020). Compared with  
184 Bassoon and Homer, VGAT had a more extended staining pattern, consistent with the known distribution  
185 of synaptic vesicles throughout pre-synaptic boutons. Elaborately shaped compartments with dense VGAT  
186 staining were seen with multiple synaptic release sites marked by Bassoon (Fig. 2C). As expected, these  
187 release sites were not paired with the excitatory post-synaptic marker Homer. These results demonstrate  
188 the ability of TREx to preserve correct synaptic staining while enabling sub-diffraction limited imaging of  
189 large tissue sections.

## 190 **Validation of expansion factor and deformation**

191         Increasing the expansion factor from 4 to 10x could result in greater sensitivity of the expansion  
192 factor to local variation, for example in protein dense complexes, resulting in less uniform expansion. To  
193 examine this, we explored the nanoscale isotropy of TREx by imaging nuclear pore complexes (NPCs),  
194 which have a highly stereotyped and well characterized structure on the sub-100 nm scale. NPCs have  
195 recently been explored as a reference structure for super-resolution microscopy methods, including ExM in  
196 combination with other super-resolution methods (Pesce, Cozzolino, Lanzaò, Diaspro, & Bianchini, 2019;  
197 Thevathasan et al., 2019). For the conventional 4-5x expansion approach, this revealed that the diameter of  
198 the NPC was 14-29% smaller than expected from the macroscopic expansion of the gel. We used a NUP96-  
199 GFP homozygous knock-in cell line (Thevathasan et al., 2019) to study the quality of nuclear pore  
200 expansion using TREx with well validated anti-GFP antibodies (Fig. 3A). After expansion with TREx,  
201 individual NPCs were uniformly retained and clearly visible using diffraction-limited confocal microscopy  
202 (Fig. 3B). An antibody against NUP153 similarly demonstrated individual NPCs but with less complete  
203 NPC coverage compared with the antibody stain against the NUP96-GFP tag (Fig. 3C). The macroscopic  
204 gel expansion factor was 9.5x, suggesting an expected NPC size after expansion of  $107 \text{ nm} \times 9.5 = 1.02$   
205  $\mu\text{m}$ . We used a semi-automated approach to determining the diameter of 60 NPCs randomly chosen from  
206 three non-adjacent cells and found the size after expansion to be  $939 \text{ nm} \pm 90 \text{ nm}$  (mean  $\pm$  S.D.) (Fig. 3D).  
207 This is about 8% smaller than expected based on the macroscopic expansion of the gel and implies a local  
208 expansion factor of 8.8x, or 92% of the expected 9.5x. These data indicate that TREx offers more uniform  
209 local expansion compared to conventional ExM.

210         We further quantified the measurement error introduced by non-uniform expansion by comparing  
211 antibody-stained microtubules imaged before expansion with 3D gSTED versus after expansion with  
212 confocal microscopy (Fig. 3E, F), as described previously (F. Chen et al., 2015). Measurement lengths  
213 between pairs of points after expansion were compared to the distance expected given uniform expansion,  
214 and the average fractional deviation plotted as a function of measurement length (Fig. 3G). For a large



215 acquisition of 42 fields of view (~650x750  $\mu\text{m}$  after expansion), the measurement error was found to be a  
216 constant fraction ( $3.2\% \pm 1.7$ ) of the measurement length (Fig. 3G). We used the similarity transform to  
217 calculate the overall expansion factor of the entire imaged area, and found it to be 9.4x, consistent with the  
218 expansion expected for the whole gel. Together, these data show that TREx enables uniform single step,  
219 ten-fold expansion that retains nanoscopic detail over large distances, in both cultured cells and thick tissue  
220 slices, with equal or better performance compared with the original 4x ExM.

## 221 **TREx enables subcellular localization of proteins and cellular ultrastructure in cultured cells**

222 We next explored the use of TREx for high-resolution imaging of specific proteins, NHS stains and  
223 lipid membranes in cultured cells. For membranes, a custom-synthesized membrane probe compatible with  
224 the ExM process has been shown to visualize membranes in fixed brain tissue (Karagiannis et al., 2019).  
225 This probe relies on a peptide-modified lipid tail that intercalates in target membranes and provides  
226 opportunities for anchoring to the gel through D-lysines in its peptide sequence. We asked whether the  
227 commercially available membrane-binding fluorophore-cysteine-lysine-palmitoyl group (mCLING) could  
228 also be used for membrane staining and gel anchoring. mCLING has been developed as a fixable  
229 endocytosis marker consisting of a fluorophore and a short polypeptide group with one cysteine and seven  
230 lysines coupled to a palmitoyl membrane anchor (Revelo & Rizzoli, 2016). Due to the presence of multiple  
231 lysines, we hypothesized that mCLING would be compatible with standard ExM anchoring through AcX.  
232 While the standard protocol for mCLING delivery relies on active endocytosis in living cells, we tested  
233 whether mCLING would stain intracellular membranes more uniformly when added to fixed cells, which  
234 would have the added benefit of not perturbing intracellular membrane trafficking by long incubation in  
235 live cells. To test this, we fixed activated Jurkat T cells, incubated the fixed cells with mCLING overnight,  
236 and proceeded with the TREx protocol. We found that mCLING efficiently intercalates in both the plasma  
237 membrane and internal organelles and is retained following our standard anchoring procedure (Fig. 4A and  
238 Fig. 4—supp. Movie 1).

239 By carefully rendering the imaged volumes we could, with one probe, both appreciate the ruffled  
240 morphology of the plasma membrane on top of the flattened part of the cell and visualize the organelle  
241 clustering typical of activated T-cells (Fig. 4A, B). As in electron microscopy, where distinct morphologies  
242 are used to identify organelles, we could clearly identify different organelles based on mCLING, suggesting  
243 that it could be used for automated segmentation of organelles. Indeed, we found that mitochondria could  
244 be readily segmented using a trainable Weka segmentation algorithm (Fig. 4B) (Arganda-Carreras et al.,  
245 2017). While the resolution of subcellular structures is limited by the density of mCLING moieties in the  
246 membrane, the efficiency of crosslinking to the gel, and the maximum expansion factor, we found TREx  
247 allows sufficient single-step expansion to resolve individual mitochondrial cristae (Fig. 4C), which are

248 known to be as closely spaced as 70 nm (Stephan, Roesch, Riedel, & Jakobs, 2019). Although mCLING is  
249 membrane impermeable in live cells (due to multiple positively charged amino groups), it readily stained  
250 fixed and unpermeabilized cells following extended incubation. Because this approach does not require  
251 labeling live cells and is expected to reduce differences in uptake efficiency between intracellular  
252 compartments, we used this approach in all subsequent experiments.

253 We next tested if mCLING could also be used to visualize membranes in more complex cell types.  
254 To test this, we used differentiated Caco-2 cells grown to form an epithelial monolayer. Using TREx, we  
255 could expand the entire monolayer and visualize membranes using mCLING (Fig. 4D-H and Fig. 4—supp.  
256 Movie 2). The advantage of optical, volumetric imaging is underscored by the fact that we can easily render  
257 one dataset in several ways, either resembling scanning electron microscopy to highlight volumetric surface  
258 morphology (Fig. 4D), or transmission electron microscopy to explore single planes in more detail (Fig.  
259 4E, F). For example, we were able to resolve the elaborate interdigitated cell-cell junctions that could  
260 previously only be clearly appreciated using electron microscopy (Drenckhahn & Franz, 1986), as well as  
261 resolve individual microvilli as hollow membrane protrusions within the dense brush border. To underscore  
262 the significant resolution increase of TREx compared to standard ExM we incubated expanded TREx gels  
263 with solutions of increasing ionic strength to shrink the gel back to ~4.5 times the size of the pre-expanded  
264 gel (Fig. 4G and Fig. 4—fig. sup. 1). When the 10x and 4.5x expanded gels were imaged, dense brush  
265 borders of differentiated cells could only be resolved in the 10x gel (Fig. 4G). To validate the expansion  
266 factor, we quantified the diameter of individual microvilli, as these have been thoroughly characterized  
267 with EM with a diameter of ~100 nm (Scott W, Mark S, & Matthew J, 2014). Indeed, we found an average  
268 diameter of  $1.08 \pm 0.16 \mu\text{m}$  ( $n=12339$  from 12 cells,  $N=3$ ), which corrected for an expansion factor of 10  
269 is within the expected range. Together, these data illustrate the robustness of TREx in expanding multiple  
270 cell types and show how the increased expansion factor combined with a commercially available membrane  
271 stain provides rapid volumetric insights into the elaborate membranous architecture of cells.

272 Previously, we have used ExM to study the three-dimensional organization of microtubules (MT)  
273 in neurons and T cells (Hooikaas et al., 2020; Jurriens, van Batenburg, Katrukha, & Kapitein, 2020;  
274 Katrukha, Jurriens, Pastene, & Kapitein, 2021). For high-resolution imaging of the MT cytoskeleton, cells  
275 are usually pre-extracted with detergent and glutaraldehyde to remove the soluble pool of tubulin, followed  
276 by paraformaldehyde fixation (Tas et al., 2017). This reduces background but does not preserve membranes.  
277 We reasoned that the increased expansion of TREx would dilute the soluble tubulin background by the  
278 expansion factor cubed. Ten-fold expanded microtubules remain diffraction limited in width (i.e., 250-350  
279 nm), so their signal should be reduced only by the expansion factor itself (due to the expansion along their  
280 length). Therefore, we asked whether the resulting relative boost in signal over background would eliminate

281 the need for pre-extraction to enable high-resolution imaging of microtubules in combination with  
282 membranes. To test this, we fixed cells without pre-extraction, treated them with mCLING, stained for  
283 tubulin, and imaged the stained cells both before and after expansion with TREx (Fig. 5A, second panel).  
284 Expanded cells retained high quality anti-tubulin antibody signal exhibiting high contrast relative to the  
285 cytosolic background. We also observed increased detail in both mCLING and tubulin stains after  
286 expansion compared to before expansion, which was particularly apparent with side views of the same cell  
287 (Fig. 5A, far right). We next fixed cells expressing GFP-Sec61 $\beta$  without pre-extraction, treated them with  
288 mCLING, stained for GFP and tubulin, and then proceeded with TREx (Fig. 5B and Fig. 5-supp. Movie 1).  
289 Subsequent confocal microscopy revealed the interplay between microtubules and ER in three dimensions  
290 and revealed how other membranous organelles were connected to both structures (Fig. 5B, bottom). Thus,  
291 TREx facilitates high-resolution three-dimensional mapping of specific cytoskeletal and membranous  
292 structures in combination with markers that provide ultrastructural context.

293 Finally, we tested whether TREx using general membrane stains could be combined with general  
294 protein stains and/or antibody stains. U2OS cells transfected with GFP-Sec61 $\beta$  were fixed, treated with  
295 mCLING, stained for GFP, and expanded with TREx followed by the NHS stain (Fig. 5C). Because we  
296 performed the NHS stain after disruption, we used high-temperature denaturing disruption, rather than  
297 proteolytic digestion. We found that secondary antibodies that had been used to stain GFP before gelation  
298 withstood this disruption step. We observed a clear degree of overlap between mCLING and NHS,  
299 especially in the dense perinuclear region, but we could also identify distinct features of each stain (Fig.  
300 5C, bottom). These results demonstrate that general stains for membranes and proteins can be combined  
301 with antibody-based labeling to reveal specific proteins in their ultrastructural context.

## 302 **DISCUSSION**

303 We developed Ten-fold Robust Expansion (TREx) in order to expand biological specimens 10-fold  
304 in a single round of expansion, without specialized equipment or procedures. In developing this method,  
305 we established a framework for assessing gel recipes operating near this apparent limit of single-round  
306 expansion. We found that the mechanical performance of gel recipes, i.e. resistance to deformation versus  
307 gel expansion factor, varies smoothly with changes in crosslinker. For all high monomer (~3 M total  
308 acrylamide and acrylate) gel recipe families, the relation between expansion factor and crosslinker  
309 concentration fell close to a common curve. The high radical initiation rate of family B enabled gelation  
310 without the inclusion of a crosslinker, suggesting that side reactions and polymer entanglement in these  
311 conditions create sufficient network crosslinks to form a gel. Gel deformation measurements plotted versus  
312 expansion factor, though less precise, also show high-monomer recipe families falling close to a common  
313 curve. Compared to the high-monomer families, the original ExM recipe family is less resistant to

314 deformation for a given expansion factor and expands more for a given crosslinker concentration. The factor  
315 determining gel properties is not crosslinker concentration in the gel recipe *per se*, but rather the density of  
316 effective crosslinks formed between neighboring polymer chains in the gel. This suggests that the original,  
317 low-monomer recipe less efficiently incorporates crosslinker molecules as network crosslinks. This may be  
318 because the resulting lower rate of chain extension allows incorporated crosslinker molecules to be re-  
319 reacted by the same polymer chain before they can react with neighboring polymers.

320 While the expansion factor of the original ExM recipe can be tuned by varying the crosslinker  
321 concentration, it has been shown that increasing the monomer content is required to maintain nanoscale  
322 isotropy, using centrioles as a convenient standard reference structure (Gambarotto et al., 2019).  
323 Considering gel quality versus expansion factor alone, the high monomer recipe family B derived from the  
324 U-ExM recipe allows for a 10-fold expanding gel (at crosslinker concentration of 30 ppm) with a low  
325 deformation index of 0.13. However, the high radical initiation rate used in this family (5 ppt APS and  
326 TEMED) results in fast gelation. This increases the time sensitivity of mounting the specimen in the gelation  
327 chamber and adds an additional challenge for adapting the method to thick tissues, requiring extended  
328 incubation in the gelation solution. Recipe families C and D solve this problem by reducing initiation rates,  
329 at a slight expense of mechanical performance compared with family B. Like family B, family C has a high  
330 acrylate content, which might contribute to imaging artifacts due to shrinkage of the sample prior to  
331 gelation, and inconsistent acrylate purity. Family D reduces the acrylate content by half while retaining  
332 similar mechanical performance to family C, especially in the ten-fold expansion regime. Finally, with  
333 family E we explored whether increasing the gelation temperature to 50 °C would produce the improved  
334 mechanical performance of family B (through increased temperature-dependent radical initiation) without  
335 premature gelation at room temperature. However, we found that this reduced the expansion factor and  
336 increased susceptibility to experimental variation. Therefore, we based our TREx recipe on recipe family  
337 D. The exact crosslinker concentration that produces 10-fold expanding gels was found to vary between  
338 labs (i.e. 50 ppm in Ashburn, VA, USA versus 90 ppm in Utrecht, The Netherlands, possibly due to  
339 differences in gelation chamber design), so we recommend that each lab test a range of crosslinker  
340 concentrations between 30 and 100ppm using their choice of specimen, gelation chamber, and incubator.

341 Earlier work has used the well-known architecture of the nuclear pore complex to compare  
342 macroscopic and nanoscopic expansion factors. For the conventional 4x expansion approach this revealed  
343 that the NPC diameter was 14-29% smaller than expected (Pesce et al., 2019; Thevathasan et al., 2019),  
344 suggesting that protein-dense complexes may resist full expansion. Using TREx, we found a NPC diameter  
345 that was only 8% smaller than the expected value. Further optimization of anchoring and disruption  
346 conditions may improve expansion uniformity for protein-dense structures such as NPCs. For applications

347 requiring precise measurements, this may need to be validated for different structures individually. We  
348 characterized the overall expansion isotropy by comparing microtubules before and after expansion, finding  
349 expansion-induced measurement errors on average 3.2% of a given measurement length. This is in line with  
350 previous expansion methods (F. Chen et al., 2015; Tillberg et al., 2016) and is not a limiting factor for most  
351 biological applications.

352 We applied TREx to mouse brain tissue slices stained either for specific targets with antibodies, or  
353 for total protein distribution with NHS ester dyes. Single round ten-fold expansion with TREx followed by  
354 total protein staining was sufficient to reveal densely packed axons and dendrites running through the  
355 neuropil, while individual organelles could be resolved within the neuronal soma. The nuclear envelope,  
356 along with presumptive nuclear pore complexes, was also clearly resolved. The correct relative localizations  
357 of pre- and post-synaptic markers and pre-synaptic neurotransmitter vesicles stained with standard  
358 immunofluorescence were also retained in TREx-expanded tissue slices. For this characterization, we used  
359 a hybrid disruption approach incorporating reduced proteinase K digestion followed by high-temperature  
360 denaturation. We adopted this hybrid approach because we have noticed that sometimes the reduced  
361 protease treatment alone produces under-expanded nuclei while the protease-free treatment alone produces  
362 under-expanded synapses. In general, a higher degree of anchoring requires higher disruption strength to  
363 achieve full expansion on the macroscopic level. Further application-specific optimization may be  
364 beneficial, given the heterogeneity of biological tissue. For applications where maximizing total protein  
365 retention is not a priority, we recommend simply using a high concentration of proteinase K (e.g. 1:100  
366 dilution, overnight).

367 We further demonstrated the utility of TREx for the study of cell biology through combinations  
368 with several staining modalities in cultured cells, prepared in several culture formats. After a single round  
369 of expansion with TREx, the commercially available membrane stain mCLING was able to clearly resolve  
370 the internal structure of mitochondria and the detailed pattern of plasma membrane ruffling in activated  
371 Jurkat T cells. While these structures would be readily resolved with electron microscopy of mechanically  
372 sectioned cells, we were able to do so in the context of complete cells, enabling concomitant detection and  
373 automated segmentation of mitochondria clustered followed T cell activation. Caco-2 cells grown on  
374 permeable filters were also successfully stained with mCLING and expanded with TREx to reveal the  
375 detailed structure of epithelial microvilli and membrane interdigitations at the contacts of neighboring cells.  
376 These structures had previously been known from electron microscopy but were now imaged with ease in  
377 the context of entire cell monolayers. Successful application of TREx to filter-cultured Caco-2 cells further  
378 demonstrates the robustness of TREx, because we had repeatedly failed to cleanly recover epithelial  
379 cultures using standard ExM. The robustness of TREx has been further demonstrated by its adoption in

380 other biological systems (Gros, Damstra, Kapitein, Akhmanova, & Berger, 2021) including in cultured  
381 neurons (Özkan et al., 2021) and primary cultured human cells (Nijenhuis et al., 2021), and by its superior  
382 mechanical properties as measured by traditional materials characterization methods (R. Chen et al., 2021).

383 Combining mCLING with a total protein stain using NHS ester dye and an antibody marking the  
384 endoplasmic reticulum (ER) in U2OS cells, shows close contacts between ER and other organelles. While  
385 the NHS ester and mCLING staining patterns were similar in their overall contours, some clear differences  
386 in staining patterns were noted, including the presence of presumptive nuclear pore complexes in the NHS  
387 ester channel. The strong overlap between NHS ester and mCLING stains was not unexpected, given the  
388 reactivity of NHS esters towards both unreacted lysines in the mCLING molecule and antibodies. However,  
389 the extent to which NHS ester staining is truly unbiased over all proteins and how it may be modulated by  
390 the local environment awaits further exploration.

391 In U2OS cells, TREx retained anti-tubulin antibody stain with high efficiency, maintaining  
392 continuous microtubules with high signal-to-noise ratio after 1000-fold volumetric expansion. Combined  
393 staining for ER and all membranes revealed close appositions along microtubules, ER and presumptive  
394 mitochondria. In unexpanded cells, high quality antibody staining for microtubules requires non-  
395 polymerized tubulin to be removed with a pre-extraction step, which destroys membranes and extracts other  
396 proteins. For specimens expanded with TREx, this is not necessary as the monomeric tubulin signal is  
397 diluted 1000-fold volumetrically, while the diameter of an expanded microtubule is still below the  
398 diffraction limit, so the signal is only diluted by the 10-fold linear expansion factor. This 1000-fold  
399 volumetric dilution is also what enables the use of dense protein stains such as NHS ester dyes, which in  
400 unexpanded specimens would be too dense to resolve any meaningful structure.

401 In summary, by systematically exploring the ExM recipe space we established a novel recipe using  
402 standard ExM reagents that has been rapidly adopted by other labs. TREx allows for ten-fold expansion of  
403 both thick tissue slices and cells in a single expansion step and has applications in tissue and high-resolution  
404 subcellular imaging. Importantly, TREx of antibody-stained samples can be combined with off-the-shelf  
405 small molecule stains for both membranes and total protein to localize specific proteins in their  
406 ultrastructural context.

## 407 ACKNOWLEDGMENTS

408 We are grateful to Sven van IJzendoorn (UMCG) and Wilco Nijenhuis (UU) for providing the Caco2  
409 monolayer samples. We thank the Janelia light microscopy core facility for the use of confocal and  
410 lightsheet microscopes. We thank the Janelia cell culture core facility for maintaining and providing  
411 cultured cells. We thank the Janelia histology core facility for providing tissue slices. A.A. is supported  
412 by the Netherlands Organization for Scientific Research Spinoza Prize. L.C.K. is supported by the  
413 European Research Council (ERC Consolidator Grant 819219). B.M., M.E., and P.W.T. are supported by  
414 the Howard Hughes Medical Institute (HHMI).

## 415 REFERENCES

- 416 Arganda-Carreras, I., Kaynig, V., Rueden, C., Eliceiri, K. W., Schindelin, J., Cardona, A., & Seung, H. S.  
417 (2017). Trainable Weka Segmentation: A machine learning tool for microscopy pixel classification.  
418 *Bioinformatics*. <https://doi.org/10.1093/bioinformatics/btx180>
- 419 Berg, S., Kutra, D., Kroeger, T., Straehle, C. N., Kausler, B. X., Haubold, C., ... Kreshuk, A. (2019).  
420 ilastik: interactive machine learning for (bio)image analysis. *Nature Methods* 2019 16:12, 16(12),  
421 1226–1232. <https://doi.org/10.1038/s41592-019-0582-9>
- 422 Bogovic, J. A., Hanslovsky, P., Wong, A., & Saalfeld, S. (2016). Robust registration of calcium images  
423 by learned contrast synthesis. *Proceedings - International Symposium on Biomedical Imaging*,  
424 2016-June, 1123–1126. <https://doi.org/10.1109/ISBI.2016.7493463>
- 425 Chang, J.-B., Chen, F., Yoon, Y.-G., Jung, E. E., Babcock, H., Kang, J. S., ... Boyden, E. S. (2017).  
426 Iterative expansion microscopy. *Nature Methods*, 14(6), 593–599.  
427 <https://doi.org/10.1038/nmeth.4261>
- 428 Chen, F., Tillberg, P. W., & Boyden, E. S. (2015). Expansion microscopy. *Science (New York, N.Y.)*,  
429 347(6221), 543–548. <https://doi.org/10.1126/science.1260088>
- 430 Chen, R., Zeng, S., Cheng, X., Yang, X., Liu, X., Zhang, Y., ... Zeng, S. (2021). Expansion tomography  
431 for large volume tissue imaging with nanoscale resolution. *Biomedical Optics Express*, Vol. 12,  
432 Issue 9, Pp. 5614-5628, 12(9), 5614–5628. <https://doi.org/10.1364/BOE.431696>
- 433 Drenckhahn, D., & Franz, H. (1986). Identification of actin-,  $\alpha$ -actinin-, and vinculin-containing plaques  
434 at the lateral membrane of epithelial cells. *Journal of Cell Biology*.  
435 <https://doi.org/10.1083/jcb.102.5.1843>
- 436 Gambarotto, D., Zwettler, F. U., Le Guennec, M., Schmidt-Cernohorska, M., Fortun, D., Borgers, S., ...

- 437 Guichard, P. (2019). Imaging cellular ultrastructures using expansion microscopy (U-ExM). *Nature*  
438 *Methods*, 16(1), 71–74. <https://doi.org/10.1038/s41592-018-0238-1>
- 439 Gao, M., Maraschini, R., Beutel, O., Zehtabian, A., Eickholt, B., Honigmann, A., & Ewers, H. (2018).  
440 Expansion Stimulated Emission Depletion Microscopy (ExSTED). *ACS Nano*, 12(5), 4178–4185.  
441 <https://doi.org/10.1021/ACSNANO.8B00776>
- 442 Gao, R., Asano, S. M., Upadhyayula, S., Pisarev, I., Milkie, D. E., Liu, T. L., ... Betzig, E. (2019).  
443 Cortical column and whole-brain imaging with molecular contrast and nanoscale resolution.  
444 *Science*, 363(6424). <https://doi.org/10.1126/science.aau8302>
- 445 Glebov, O. O., Cox, S., Humphreys, L., & Burrone, J. (2016). Neuronal activity controls transsynaptic  
446 geometry. *Scientific Reports 2016 6:1*, 6(1), 1–11. <https://doi.org/10.1038/srep22703>
- 447 Gros, O. J., Damstra, H. G. J., Kapitein, L. C., Akhmanova, A., & Berger, F. (2021). Dynein self-  
448 organizes while translocating the centrosome in T-cells. *Molecular Biology of the Cell*, 32(9), 855–  
449 868. [https://doi.org/10.1091/MBC.E20-10-0668/ASSET/IMAGES/MEDIUM/MBC-32-855-  
450 G001.GIF](https://doi.org/10.1091/MBC.E20-10-0668/ASSET/IMAGES/MEDIUM/MBC-32-855-G001.GIF)
- 451 Gustafsson, M. G. L. (2000). Surpassing the lateral resolution limit by a factor of two using structured  
452 illumination microscopy. *Journal of Microscopy*, 198(2), 82–87. [https://doi.org/10.1046/j.1365-  
453 2818.2000.00710.x](https://doi.org/10.1046/j.1365-2818.2000.00710.x)
- 454 Halpern, A. R., Alas, G. C. M., Chozinski, T. J., Paredes, A. R., & Vaughan, J. C. (2017). Hybrid  
455 Structured Illumination Expansion Microscopy Reveals Microbial Cytoskeleton Organization. *ACS*  
456 *Nano*, 11(12), 12677–12686. <https://doi.org/10.1021/acsnano.7b07200>
- 457 Hell, S. W., & Wichmann, J. (1994). Breaking the diffraction resolution limit by stimulated emission:  
458 stimulated-emission-depletion fluorescence microscopy. *Optics Letters*, 19(11), 780.  
459 <https://doi.org/10.1364/ol.19.000780>
- 460 Hooikaas, P. J., Damstra, H. G. J., Gros, O. J., van Riel, W. E., Martin, M., Smits, Y. T. H., ...  
461 Akhmanova, A. (2020). Kinesin-4 kif21b limits microtubule growth to allow rapid centrosome  
462 polarization in t cells. *ELife*, 9, 1–75. <https://doi.org/10.7554/ELIFE.62876>
- 463 Julio, G., Merindano, M. D., Canals, M., & Ralló, M. (2008). Image processing techniques to quantify  
464 microprojections on outer corneal epithelial cells. *J. Anat*, 212, 879–886.  
465 <https://doi.org/10.1111/j.1469-7580.2008.00898.x>
- 466 Jurriens, D., van Batenburg, V., Katrukha, E. A., & Kapitein, L. C. (2020). Mapping the neuronal



- 467 cytoskeleton using expansion microscopy. In *Methods in Cell Biology*.  
468 <https://doi.org/10.1016/bs.mcb.2020.04.018>
- 469 Karagiannis, E. D., Seuk Kang, J., Won Shin, T., Emenari, A., Asano, S., Lin, L., ... Boyden, E. S.  
470 (2019). Expansion Microscopy of Lipid Membranes. *BioRxiv*. <https://doi.org/10.1101/829903>
- 471 Katrukha, E. A., Jurriens, D., Pastene, D. S., & Kapitein, L. C. (2021). Quantitative mapping of dense  
472 microtubule arrays in mammalian neurons. *BioRxiv*, 2021.02.26.432992.  
473 <https://doi.org/10.1101/2021.02.26.432992>
- 474 Ku, T., Swaney, J., Park, J.-Y., Albanese, A., Murray, E., Cho, J. H., ... Chung, K. (2016). Multiplexed  
475 and scalable super-resolution imaging of three-dimensional protein localization in size-adjustable  
476 tissues. *Nature Biotechnology*, 34(9), 973–981. <https://doi.org/10.1038/nbt.3641>
- 477 M'Saad, O., & Bewersdorf, J. (2020). Light microscopy of proteins in their ultrastructural context. *Nature*  
478 *Communications*. <https://doi.org/10.1038/s41467-020-17523-8>
- 479 Mao, C., Lee, M. Y., Jhan, J.-R., Halpern, A. R., Woodworth, M. A., Glaser, A. K., ... Vaughan, J. C.  
480 (2020). Feature-rich covalent stains for super-resolution and cleared tissue fluorescence microscopy.  
481 *Science Advances*, 6(22), eaba4542. <https://doi.org/10.1126/sciadv.aba4542>
- 482 Nijenhuis, W., Damstra, H. G. J., Grinsven, E. J. van, Iwanski, M. K., Praest, P., Soltani, Z. E., ...  
483 Kapitein, L. C. (2021). Optical nanoscopy reveals SARS-CoV-2-induced remodeling of human  
484 airway cells. *BioRxiv*, 2021.08.05.455126. <https://doi.org/10.1101/2021.08.05.455126>
- 485 Okay, O. (2009). General Properties of Hydrogels. In A. K. Gerlach G. (Ed.), *Hydrogel Sensors and*  
486 *Actuators. Springer Series on Chemical Sensors and Biosensors (Methods and Applications)* (vol. 6,  
487 pp. 1–14). [https://doi.org/10.1007/978-3-540-75645-3\\_1](https://doi.org/10.1007/978-3-540-75645-3_1)
- 488 Özkan, N., Koppers, M., van Soest, I., van Harten, A., Jurriens, D., Liv, N., ... Fariás, G. G. (2021). ER –  
489 lysosome contacts at a pre-axonal region regulate axonal lysosome availability. *Nature*  
490 *Communications 2021 12:1*, 12(1), 1–18. <https://doi.org/10.1038/s41467-021-24713-5>
- 491 Pesce, L., Cozzolino, M., Lanzaò, L., Diaspro, A., & Bianchini, P. (2019). Measuring expansion from  
492 macro- to nanoscale using NPC as intrinsic reporter. *Journal of Biophotonics*, 12(8), e201900018.  
493 <https://doi.org/10.1002/JBIO.201900018>
- 494 Revelo, N. H., & Rizzoli, S. O. (2016). The membrane marker mCLING reveals the molecular  
495 composition of trafficking organelles. *Current Protocols in Neuroscience*.  
496 <https://doi.org/10.1002/0471142301.ns0225s74>

- 497 Rust, M. J., Bates, M., & Zhuang, X. W. (2006). Sub-diffraction-limit imaging by stochastic optical  
498 reconstruction microscopy (STORM). *Nat Methods*, 3(10), 793–795. <https://doi.org/10.1038/Nmeth929>
- 500 Scott W, C., Mark S, M., & Matthew J, T. (2014). Shaping the intestinal brush border. *The Journal of*  
501 *Cell Biology*, 207(4), 441–451. <https://doi.org/10.1083/JCB.201407015>
- 502 Stephan, T., Roesch, A., Riedel, D., & Jakobs, S. (2019). Live-cell STED nanoscopy of mitochondrial  
503 cristae. *Scientific Reports 2019 9:1*, 9(1), 1–6. <https://doi.org/10.1038/s41598-019-48838-2>
- 504 Tas, R. P., Chazeau, A., Cloin, B. M. C., Lambers, M. L. A., Hoogenraad, C. C., & Kapitein, L. C.  
505 (2017). Differentiation between Oppositely Oriented Microtubules Controls Polarized Neuronal  
506 Transport. *Neuron*. <https://doi.org/10.1016/j.neuron.2017.11.018>
- 507 Thevathasan, J. V., Kahnwald, M., Cieśliński, K., Hoess, P., Peneti, S. K., Reitberger, M., ... Ries, J.  
508 (2019). Nuclear pores as versatile reference standards for quantitative superresolution microscopy.  
509 *Nature Methods*, 16(10), 1045–1053. <https://doi.org/10.1038/s41592-019-0574-9>
- 510 Tillberg, P. W., Chen, F., Piatkevich, K. D., Zhao, Y., Yu, C.-C., English, B. P., ... Boyden, E. S. (2016).  
511 Protein-retention expansion microscopy of cells and tissues labeled using standard fluorescent  
512 proteins and antibodies. *Nature Biotechnology*, 34(9), 987–992. <https://doi.org/10.1038/nbt.3625>
- 513 Truckenbrodt, S., Maidorn, M., Crzan, D., Wildhagen, H., Kabatas, S., & Rizzoli, S. O. (2018). X10  
514 expansion microscopy enables 25-nm resolution on conventional microscopes. *EMBO Reports*,  
515 19(9), e45836. <https://doi.org/10.15252/embr.201845836>
- 516 Truckenbrodt, S., Sommer, C., Rizzoli, S. O., & Danzl, J. G. (2019). A practical guide to optimization in  
517 X10 expansion microscopy. *Nature Protocols*. <https://doi.org/10.1038/s41596-018-0117-3>
- 518 Wiesner, T., Bilodeau, A., Bernatchez, R., Deschênes, A., Raulier, B., De Koninck, P., & Lavoie-  
519 Cardinal, F. (2020). Activity-Dependent Remodeling of Synaptic Protein Organization Revealed by  
520 High Throughput Analysis of STED Nanoscopy Images. *Frontiers in Neural Circuits*, 0, 57.  
521 <https://doi.org/10.3389/FNCIR.2020.00057>
- 522 Xu, H., Tong, Z., Ye, Q., Sun, T., Hong, Z., Zhang, L., ... Cang, H. (2019). Molecular organization of  
523 mammalian meiotic chromosome axis revealed by expansion STORM microscopy. *Proceedings of*  
524 *the National Academy of Sciences of the United States of America*, 116(37), 18423–18428.  
525 <https://doi.org/10.1073/pnas.1902440116>
- 526 Yu, C.-C. (Jay), Barry, N. C., Wassie, A. T., Sinha, A., Bhattacharya, A., Asano, S., ... Boyden, E. S.

- 527 (2020). Expansion microscopy of *C. elegans*. *ELife*, 9. <https://doi.org/10.7554/eLife.46249>
- 528 Zhang, Y. S., Chang, J.-B., Alvarez, M. M., Trujillo-de Santiago, G., Aleman, J., Batzaya, B., ...  
529 Khademhosseini, A. (2016). Hybrid Microscopy: Enabling Inexpensive High-Performance Imaging  
530 through Combined Physical and Optical Magnifications. *Scientific Reports*, 6(1), 22691.  
531 <https://doi.org/10.1038/srep22691>
- 532 Zwettler, F. U., Reinhard, S., Gambarotto, D., Bell, T. D. M., Hamel, V., Guichard, P., & Sauer, M.  
533 (2020). Molecular resolution imaging by post-labeling expansion single-molecule localization  
534 microscopy (Ex-SMLM). *Nature Communications* 2020 11:1, 11(1), 1–11.  
535 <https://doi.org/10.1038/s41467-020-17086-8>
- 536

## 537 MATERIALS AND METHODS

### 538 Recipe space exploration

#### 539 *Gelation chambers*

540 A glass slide served as the bottom piece of each gelation chamber. Four strips of 250  $\mu\text{m}$ -thick adhesive  
541 silicone material (Digikey cat# L37-3F-320-320-0.25-1A),  $\sim 3$  mm wide and running the width of the slide,  
542 were adhered to the slide to partition it into three separate chambers, each  $\sim 12$  mm wide. A plus-charged  
543 glass slide was placed over the silicone strips to form the top of the gelation chamber and held in place with  
544 tape. Two sides of each chamber were open to air, providing a convenient fill port for adding  $\sim 100$   $\mu\text{L}$  of  
545 monomer solution after chamber construction.

#### 546 *Gel synthesis and characterization*

547 Sodium acrylate was made by neutralizing acrylic acid (Sigma, 147230) with NaOH until the pH reached  
548 the range of 7.5-8. Initial neutralization (until pH  $\sim 7$ ) was done with 10 N NaOH on ice and using a fume  
549 hood. Neutralization was done in a volume of water calculated to yield a final concentration of 4 M sodium  
550 acrylate. The gel recipes for each family contained 1x PBS and the amounts of acrylamide (Sigma, A4058),  
551 sodium acrylate, and initiator (APS, Sigma, A3678) indicated in Fig. 1A. Each gel recipe contained the  
552 same amount of TEMED (Sigma, T7024) as APS. For each recipe family, gelation solution with crosslinker  
553 withheld (but including APS and TEMED) was premixed on ice, in one tube for each recipe family. This  
554 solution was then split into six tubes and mixed with serial dilutions of crosslinker (bisacrylamide, Sigma,  
555 M1533) to yield complete gelation solution with final crosslinker concentrations (in ppm) of 1000, 300,  
556 100, 30, 10, and 0. Complete gelation solution was pipetted into gelation chambers and incubated at 50  $^{\circ}\text{C}$   
557 for 1 hour (family E) or 37  $^{\circ}\text{C}$  for 2 hours (families A-D). Gels were then cooled for 15 minutes at room  
558 temperature and chamber tops carefully removed. Gels typically remained stuck exclusively to the top (plus  
559 charged) slide. Samples of each gel were taken with a 6 mm biopsy punch, taking care to avoid material  
560 within  $\sim 2$  mm of the chamber edges (to avoid oxygen exposure from air or silicone material during  
561 gelation). Excess gel was scraped away with a razor blade. A few drops of distilled water were pipetted  
562 onto each gel to help release them from the glass slide. Each 6 mm gel specimen was gently released from  
563 the slide with a razor blade, placed in a 9 cm Petri Dish and expanded by washing with excess water 2x 15  
564 minutes followed by 2x 1 hour. Diameters of expanded gels were measured and divided by 6 mm to obtain  
565 the expansion factor. A semi-circle 25 mm in diameter was punched from each gel using a cookie cutter.  
566 Semi-circular gel punches were placed in a plastic tray, which was stood up on end so that the gel stood

567 upright on its curved side, allowing the flat edge to deform under the force of gravity. Each gel was  
568 photographed, with a ruler positioned for scale. Using ImageJ, each top edge was described by seven  
569 manually chosen points, which were then fit to a circle. This best-fit circle was used to calculate the vertical  
570 deviation of the gel corners, which was divided by the gel radius to obtain the deformation index.

#### 571 *TREx gelation solution*

572 Sodium acrylate was either purchased (Sigma, 408220) or made by neutralizing acrylic acid as described  
573 above. TREx gelation solution contains 1.1 M sodium acrylate, 2.0 M acrylamide (AA), 50 ppm (for tissue  
574 slices and cultured cells prepared at Janelia) or 90 ppm (for cultured cells prepared at Utrecht University)  
575 N,N'-methylenebisacrylamide (bis), PBS (1x), 1.5 ppt APS, 1.5 ppt TEMED, and (optionally, for thick  
576 tissue slices) 15 ppm 4-hydroxy TEMPO (4HT, Sigma, 176141). Monomer solution was made by  
577 combining all components of gelation solution except APS, TEMED, and 4HT. Monomer solution may be  
578 aliquoted and stored at -20°C, but must be thawed at room temperature and vortexed before use to redissolve  
579 any acrylamide crystals that may have precipitated at low temperature before freezing. Fully dissolved  
580 monomer solution may be kept on ice for up to several hours before crystallization will occur. 4HT,  
581 TEMED, and APS were added to monomer solution to produce gelation solution directly before use.

#### 582 **Tissue experiments**

##### 583 *Fixation and antibody staining*

584 Mice were transcardially perfused with ice cold 4% formaldehyde in 100 mM sodium phosphate buffer, pH  
585 7.4. Brains were dissected out and post-fixed in 4% formaldehyde at 4°C overnight (Fig. 2A) or for 2 hours  
586 (Fig. 2B), followed by washing with PBS (1x) and slicing by vibratome at 100 µm. For Fig. 2B, slices were  
587 stained with standard IHC procedures. Primary antibodies were used at 1:300 dilution in PBS with 0.1%  
588 Triton and 2% BSA (PBT) overnight at 4°C (Chicken anti-Bassoon Synaptic systems cat#141016,  
589 RRID:AB\_2661779; Rabbit anti-Homer abcam cat#97593, RRID:AB\_10681160; Mouse IgG3 anti-VGAT  
590 SySy cat#131011, RRID:AB\_887872). Sections were washed 3x 30min in PBT and stained for at least 6  
591 hours in secondary antibodies 1:500 in PBT at room temperature (Goat anti-Rabbit Alexa 488 Abcam  
592 cat#150077, RRID:AB\_2630356; Goat anti-Mouse IgG3 Alexa 594 Invitrogen cat# A-21155, RRID:  
593 AB\_2535785; Goat anti-chicken CF633 Biotium cat#20126, RRID: AB\_10852831). Stained sections were  
594 washed 3x 30min in PBS.

##### 595 *TREx*

596 Brain slices were treated with 100  $\mu\text{g}/\text{mL}$  (Fig. 2A) or 10  $\mu\text{g}/\text{mL}$  (Fig. 2B) acryloyl-X SE (ThermoFisher,  
597 A20770) in PBS (diluted from a 10  $\text{mg}/\text{mL}$  anhydrous DMSO stock solution) for 1 hour at room  
598 temperature, followed by rinsing with PBS. Slices were incubated with TREx gelation solution (using 50  
599 ppm bis, and with 4HT added up to 15 ppm), for 20 min on ice, with shaking. Following incubation on ice,  
600 each tissue specimen was placed on a glass slide at room temperature. Four dabs of vacuum grease were  
601 applied to the slide, with each dab at least several mm from the tissue specimen. A coverslip was placed  
602 over the tissue and vacuum grease dabs, and pressed down until contacting the tissue, taking care not to let  
603 the tissue slide around on the slide. The vacuum grease served to hold the assembly in place, thus forming  
604 the gelation chamber. Gelation solution was pipetted into the chamber from the side to fully surround the  
605 tissue. The chamber was incubated at 37  $^{\circ}\text{C}$  for 1 hour to complete gelation. Following embedding, excess  
606 gel was removed with a razor blade, and gelled slices were recovered into PBS. The gel for Fig. 2B was  
607 digested in proteinase K (NEB, P8107S) diluted 1:1000 in PBS for 3 hours at room temperature and washed  
608 in PBS 4x 30 min. Gels for both Fig. 2A, B were then placed into disruption buffer (5% SDS, 200 mM  
609 NaCl, 50 mM Tris pH 7.5) in a 2 mL Eppendorf tube and incubated at 80  $^{\circ}\text{C}$  for 3 hours followed by rinsing  
610 in 0.4 M NaCl and washing 2x 30 min in PBS. Gels were stained with BODIPY-FL NHS (total protein  
611 stain) at 10-20  $\mu\text{M}$  (Fig. 2A) or DAPI at 200  $\mu\text{g}/\text{L}$  (Fig. 2B) in PBS for 1 hour at room temperature. Gels  
612 were placed in glass bottom 6-well plates and washed in milliQ water 3x 15 minutes followed by 2x 1 hour  
613 to fully expand. Gels were imaged using a Zeiss LSM 800 confocal microscope with 40x/1.1NA, water  
614 immersion objective (Fig. 2A) or Zeiss Z1 lightsheet microscope with 10x/0.3NA illumination objectives  
615 and 20x/1.0NA water immersion detection objective (Fig. 2B).

#### 616 *Image processing*

617 For Fig. 2A, raw data was drift corrected using Huygens Professional (SVI) and imported into ImageJ  
618 where a sum-projection of 2 planes (z-spacing: 0.8  $\mu\text{m}$ ) was made. Fig. 2B is a maximum projection of 2  
619 planes (z-spacing: 0.38  $\mu\text{m}$ ) and indicated zoom is a volumetric render of the raw data in Arivis.

#### 620 *Synaptic distance*

621 Raw data was segmented using ilastik Pixel and Object segmentation workflows (Berg et al., 2019). For  
622 each Homer-positive segmented object (post-synaptic compartment), the closest Bassoon-positive  
623 segmented object (pre-synaptic compartment) was selected. Synaptic distance was defined as the distance  
624 between the local peaks in intensity that were closest to the mask center of mass.

#### 625 **Nuclear Pore Complex experiment**

626 *Cell culture, fixation, and antibody staining*

627 U2OS cells with homozygous GFP-NUP96 knock-in (Cell Lines Service, no. 195) were maintained in  
628 DMEM (Corning) supplemented with 10% FBS (Gibco), 1% L-glutamine (Gibco), and 1% penicillin-  
629 streptomycin (Gibco). Exponentially growing cells were harvested and seeded onto 12 mm, No. 1 coverslips  
630 (Carolina Biological Supply) for use in Expansion Microscopy. Cells were grown at 37 °C and 5% CO<sub>2</sub>.  
631 Cells were fixed with 4% formaldehyde (EMS, RT 15714) in 1x PBS for 10 minutes at room temperature,  
632 then rinsed with 1xPBS. Cells were stained with standard immunocytochemistry (ICC) procedures. Primary  
633 antibodies were used at 1:200 dilution in PBS with 0.1% Triton and 2% BSA (PBT) for 2 hours at room  
634 temperature (Chicken anti-GFP, Aves cat#GFP-1020, RRID:AB\_10000240; Rabbit anti-NUP153, Abcam  
635 cat#ab84872, RRID:AB\_1859766), followed by washing 3x 5 min in 1x PBS. Secondary antibodies were  
636 used at 1:200 dilution in PBT for 2 hours at room temperature or at 4 °C overnight (Goat anti-Chicken  
637 Alexa 488, ThermoFisher Scientific cat#A11039, RRID\_AB2534096; Goat anti-Rabbit Alexa 594,  
638 ThermoFisher Scientific cat#A11037, RRID\_AB2534095), followed by washing 3x 5 min in 1x PBS.  
639 Stained cells were imaged before expansion on an epifluorescence microscope, Nikon Ti-E with 60x/NA1.2  
640 water immersion objective. The imaged region was indicated by marking the back of the coverslip with a  
641 marker.

642 *TREx*

643 Fixed cells were anchored with 100 µg/mL AcX in 1xPBS for 1 hour at room temperature and embedded  
644 using the TREx gelation solution. The gelation chamber was constructed from a 20 mm diameter, adhesive-  
645 backed silicone gasket (Sigma, GBL665504) affixed to a glass slide. The 12 mm coverslip with cultured  
646 cells was affixed to the center of the gelation chamber with a dab of vacuum grease and covered with PBS.  
647 TEMED and APS were then added to the TREx monomer solution on ice and mixed well to produce  
648 gelation solution. The PBS was tipped off from the cells, which were rinsed with ~100 µL of gelation  
649 solution. ~200 µL of gelation solution was placed into the gelation chamber, which was sealed with a 22  
650 mm-square #2 coverslip. The completed gelation chamber was placed at 37 °C for 1 hour to complete  
651 gelation. The chamber was disassembled, and the gel carefully trimmed with a curved scalpel into a right  
652 trapezoid shape centered around the pre-gelation imaged area. The trimmed trapezoid was photographed  
653 with a ruler for scale, quickly to avoid shrinking due to evaporation, and recovered into PBS. The gel was  
654 then digested with proteinase K (NEB, P8107S) diluted 1:1000 in PBS for 3 hours at room temperature and  
655 washed in PBS 4x 30 min. Digested gels were placed into disruption buffer (5% SDS, 200 mM NaCl, 50  
656 mM Tris pH 7.5) in a 2 mL Eppendorf tube and incubated at 80 °C for 3 hours followed by rinsing in 0.4  
657 M NaCl and washing 2x 30 min in PBS. Disrupted gels were expanded fully with several washes in

658 deionized water, photographed again with a ruler for scale, and imaged with a Zeiss LSM 800 confocal  
659 microscope with 40x/NA1.1 water immersion objective.

#### 660 *Data analysis*

661 The gel size before and after expansion was measured from the gel photographs. The centers of 60 randomly  
662 chosen NPCs in three non-adjacent cells were identified manually and saved as an ROI list in ImageJ. The  
663 radial intensity distribution of each NPC was computed using the “Radial Profile Plot” plugin  
664 (<https://imagej.nih.gov/ij/plugins/radial-profile.html>) and saved as a csv. Radial intensity distributions were  
665 loaded into Matlab for further processing. A Gaussian distribution was fit to a window in the middle of  
666 each profile and the center of the Gaussian was taken as the radius of the corresponding NPC.

#### 667 **Wild type, transfected, and T-cell experiments**

##### 668 *Cell culture*

669 Jurkat T cells (clone E6.1) were grown in RPMI 1640 medium w/ L-Glutamine (Lonza) supplemented with  
670 9% Fetal Bovine Serum and 1% penicillin/streptomycin. For T cell activation, 18 mm #1.5 coverslips  
671 (Marienfeld, 107032) were coated with Poly-D-Lysine (Thermo Fisher Scientific, A3890401), washed with  
672 phosphate buffered saline (PBS) and incubated overnight at 4 °C with a mouse monoclonal anti-CD3 (clone  
673 UCHT1, StemCell Technologies, #60011) 10 µg/mL in PBS. Cells were spun down for 4 minutes at 1000  
674 rpm and resuspended in fresh, prewarmed RPMI 1640 medium, after which cells were incubated on the  
675 coated coverslips for 3 minutes prior to fixation. U2OS cells were cultured in DMEM medium  
676 supplemented with 9% Fetal Bovine Serum and 1% penicillin/streptomycin. U2OS cells were transfected  
677 with GFP-Sec61β (Addgene, 15108) using FuGENE6 (Promega). Caco2-BBE cells (a gift from S.C.D. van  
678 IJzendoorn, University Medical Center Groningen, The Netherlands) were maintained in DMEM  
679 supplemented with 9% FBS, 50 µg/µl penicillin/streptomycin and 2 mM L-glutamine. For imaging, cells  
680 were seeded on 6.5 mm Transwell filters (3470; Corning) at a density of  $1 \times 10^5/\text{cm}^2$  and cultured for 10-  
681 12 days to allow for spontaneous polarization and brush border formation.

##### 682 *Immunofluorescence, mCLING treatment, and antibody staining*

683 For all experiments, cells were fixed for 10 minutes with pre-warmed (37 °C) 4% paraformaldehyde + 0.1%  
684 glutaraldehyde in PBS. For visualization of lipid membranes, cells were washed twice in PBS after fixation  
685 and incubated in 5 µM either mCLING-Atto647N (Synaptic Systems, 710 006AT1) or mCLING-Atto488  
686 (Synaptic Systems, 710 006AT3) in PBS overnight at RT. The following day, cells were fixed a second



687 time with pre-warmed (37 °C) 4% paraformaldehyde + 0.1% glutaraldehyde in PBS. Next, cells were  
688 washed with PBS and permeabilized using PBS + 0.2% Triton X-100. Epitope blocking and antibody  
689 labeling steps were performed in PBS + 3% BSA. For immunofluorescence staining, we used a rabbit  
690 monoclonal antibody against  $\alpha$ -tubulin (clone EP1332Y, Abcam, ab52866) and a chicken polyclonal  
691 antibody against GFP (Aves Labs, GFP-1010) in combination with goat anti-rabbit IgG (H+L) Alexa Fluor  
692 594 (Molecular Probes, a11037) and goat anti-chicken IgY (H+L) Alexa Fluor 488 (Molecular Probes,  
693 a11039), respectively.

#### 694 *TREx*

695 For TREx, samples were treated with 100  $\mu$ g/mL acryloyl-X SE (AcX) (Thermo Fisher, A20770) in PBS  
696 overnight at RT. TEMED and APS were added to monomer solution (1.5 ppt each) to produce gelation  
697 solution. 170  $\mu$ L of gelation solution was transferred to a silicone gasket with inner diameter of 13 mm  
698 (Sigma-Aldrich, GBL664107) attached to a parafilm-covered glass slide, with the sample put cell-down on  
699 top to close off the gelation chamber. The sample was directly transferred to a 37 °C incubator for 1 hour  
700 to fully polymerize the gel. All gels excluding samples that were processed for subsequent NHS ester  
701 staining were transferred to a 12-well plate and digested with 7.5 U/mL Proteinase-K (Thermo Fisher,  
702 EO0491) in TAE buffer (containing 40 mM Tris, 20 mM acetic acid and 1 mM EDTA) supplemented with  
703 0.5% Triton X-100, 0.8 M guanidine-HCl, and DAPI for 4 hours at 37 °C. The gel was transferred to a Petri  
704 dish, water was exchanged 2x 30 minutes and the sample was left in milliQ water to expand overnight.

705 For NHS-staining, gels were first treated in disruption buffer containing 200 mM SDS, 200 mM NaCl and  
706 50 mM Tris pH 6.8 for 1.5 hours at 78°C. Gels were washed twice for 15 minutes in PBS and incubated  
707 with 20  $\mu$ g/mL Atto 594 NHS ester (Sigma-Aldrich, 08471) in PBS prepared from a 20 mg/mL stock  
708 solution in DMSO for 1 hour at RT with shaking. After staining, gels were washed with excess of PBS,  
709 transferred to a Petri dish, and expanded overnight. Prior to imaging the cells were trimmed using a scalpel  
710 blade to fit in a Attofluor Cell Chamber (Molecular probes A-7816).

#### 711 *Image acquisition and analysis*

712 ExM and pre-expansion images were acquired using a Leica TCS SP8 STED 3X microscope equipped with  
713 a HC PL APO 86x/1.20W motCORR STED (Leica 15506333) water objective. A pulsed white laser (80  
714 MHz) was used for excitation, when using STED a 775 nm pulsed depletion laser was used. The internal  
715 Leica GaAsP HyD hybrid detectors were used with a time gate of  $1 \leq tg \leq 6$  ns. The set-up was controlled  
716 using LAS X.

717 All data processing and analysis was done using Matlab, ImageJ and Arivis.

718 Fig. 3D panels are maximum intensity projections of the bottom  $\sim 1 \mu\text{m}$  of cells. For Fig. 3E-F, BigWarp  
719 (Bogovic, Hanslovsky, Wong, & Saalfeld, 2016) was used to manually pick control points for non-rigid  
720 registration. The analysis scripts “bigwarpSimilarityPart.groovy” and  
721 “Apply\_Bigwarp\_Xfm\_csvPts.groovy” were used to calculate deformation fields that register expanded  
722 images to pre-expansion images, and decompose each deformation field into a similarity part  
723 (corresponding to theoretical ideal expansion) and a residual elastic part (thin-plate spline, corresponding  
724 to non-ideal deformations introduced by expansion), adapted from (Jurriens et al., 2020). The similarity  
725 part was used to find the macroscopic expansion factor, while the residual elastic part was used to calculate  
726 the measurement error as follows. A Matlab script was used to calculate the measurement error for all pairs  
727 of points in the image as described in (F. Chen et al., 2015) by finding the magnitude of the difference  
728 between the displacement vectors for each pair of points in the residual elastic deformation field. These  
729 differences were binned according to the distance between points in the pre-expansion image. For each  
730 measurement length bin, the mean and standard deviation of measurement errors was calculated and plotted.

731 Fig. 4A raw data was imported in Arivis, a Discrete Gaussian Filter with smoothing radius of 2 was applied  
732 and this dataset was used for volumetric renders and clipping. Gamma was adjusted manually to increase  
733 visibility of plasma membrane ruffles and intracellular organelles in the same view. For Fig. 4B, the same  
734 raw dataset was imported in ImageJ and a sum-projection of 3 planes (z-spacing:  $0.35 \mu\text{m}$ ) around the plane  
735 of the immunological synapse was segmented for mitochondria using the trainable Weka segmentation  
736 plugin in ImageJ. Fig. 4C is a sum-projection of 3 planes (z-spacing  $0.35 \mu\text{m}$ ). The linescan in Fig. 4C  
737 was generated using ImageJ and processed using Graphpad Prism 8. For Fig. 4D, raw data was imported in  
738 Arivis, a Discrete Gaussian Filter with smoothing radius of 2 was applied and this dataset was  
739 volumetrically rendered with the opacity mapped to the z-axis. Fig. 4E is a sum projection of 5 slices (z-  
740 spacing  $0.35 \mu\text{m}$ ). Fig. 4F-H are sum projections of 3 planes (z-spacing:  $0.35 \mu\text{m}$ ) and respective zooms.  
741 For the MV diameter analysis in Fig. 4H, sum projections of 3 planes were thresholded (ImageJ, set to  
742 auto), watershed to split joining particles and the area determined using the analyze particles function in  
743 ImageJ which was converted to diameter as in (Julio, Merindano, Canals, & Ralló, 2008).

744 Fig. 5A panels are sum projections of 3 planes (z-spacing before expansion and after expansion  $0.07$  and  
745  $0.15 \mu\text{m}$ , respectively), reslices are sum projections (3 planes) of resliced data. For Fig 5B, raw data was  
746 imported into Arivis, a Discrete Gaussian Filter with smoothing radius of 2 was applied and this dataset  
747 was used for volumetric renders and clipping. Shown single planes are sum projections of 3 slices (z-

748 spacing 0.35  $\mu\text{m}$ ) of the same raw data and was processed using ImageJ. Fig 5C is a maximum projection  
749 of 3 planes (z-spacing: 0.35  $\mu\text{m}$ ).

750 **FIGURES**

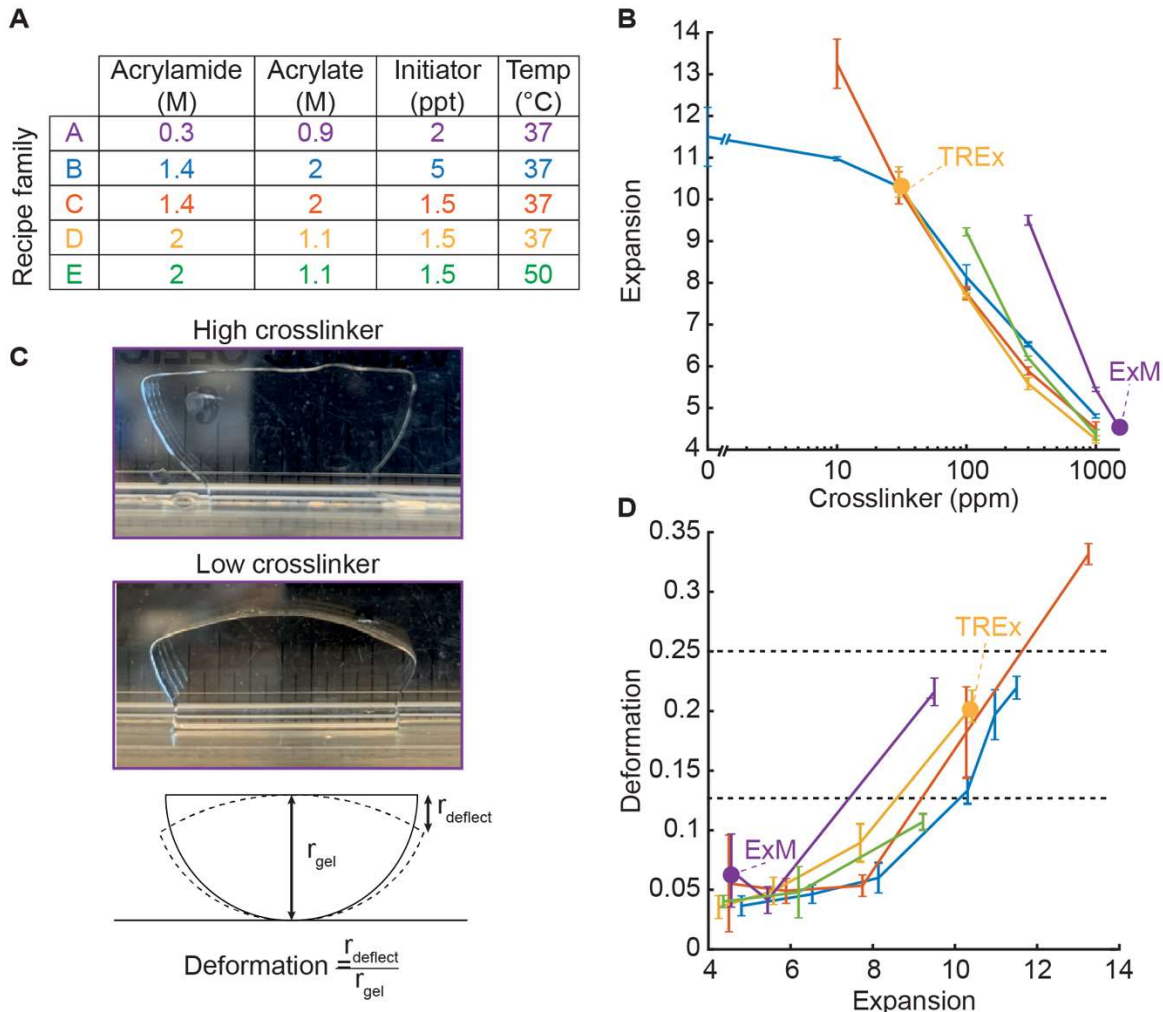

751

752 **FIGURE 1: Development of TREx gel recipe**

753 A) Parameters of gel recipe families explored, including component concentrations and gelation  
 754 temperature. Each family was characterized by keeping these conditions constant while systematically  
 755 varying the crosslinker concentration.

756 B) Expansion factor (mean  $\pm$  S.D.,  $n=3$ ) versus crosslinker concentration (log scale) for each gel recipe  
 757 family without biological specimens. Line colors correspond to recipe families as in 1A. Specific recipes  
 758 are indicated with a filled purple dot (original ExM recipe) and yellow dot (TREx). All recipe families were  
 759 tested with crosslinker concentrations of 0, 10, 30, 100, 300, 1000 ppm, plus an additional condition for  
 760 family A with 1500 ppm, corresponding to the original ExM recipe. Only conditions in which gels formed  
 761 are plotted.

762 C) Definition of gel deformation index. Example gels from recipe family A with high crosslinker and low  
763 deformation (top panel, 1.5 ppt), and low crosslinker and high deformation (middle panel, 300 ppm).  
764 Bottom panel, schematic illustrating deformation index measurement.

765 D) Deformation index (mean  $\pm$  S.D., n=3) versus expansion factor for each gel recipe family without  
766 biological specimens, with line colors and dots corresponding to specific recipes as in 1A and 1B.  
767 Horizontal grey lines indicate thresholds for gels with mechanical quality deemed perfect (deformation <  
768 0.125) and acceptable (deformation < 0.25). Ideal recipes would occupy the lower right quadrant,  
769 corresponding to high expansion and low deformability.

770

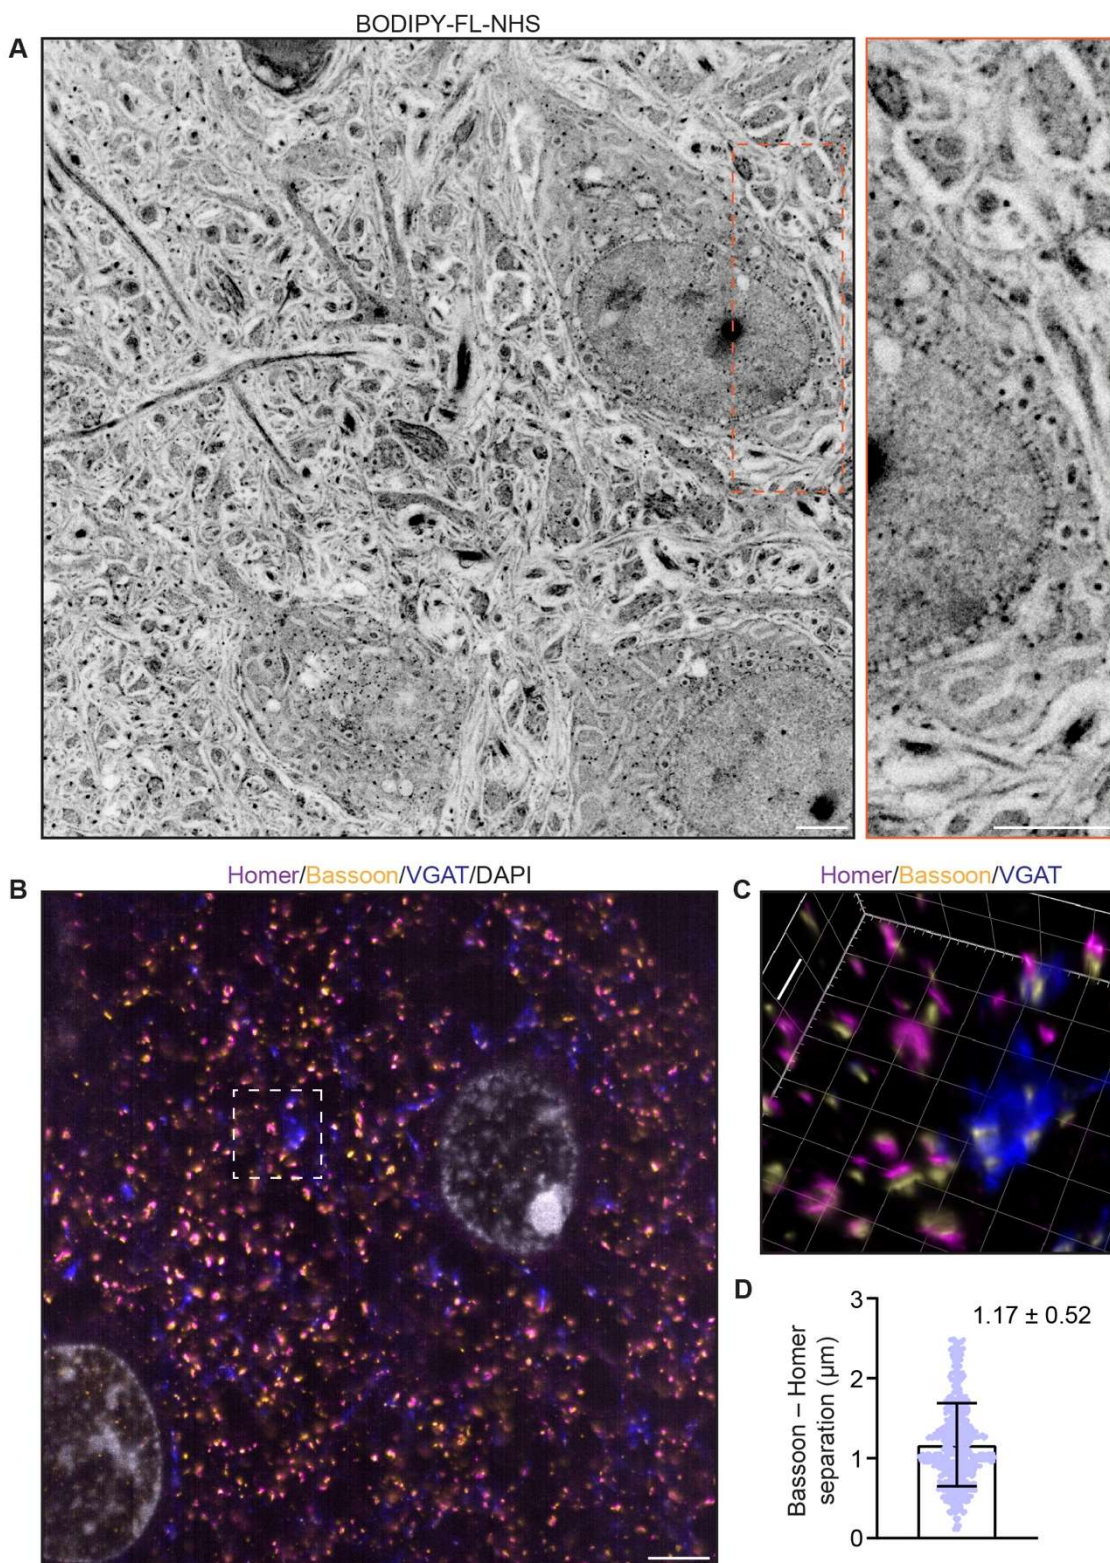

771

772 **FIGURE 2: TREx in mouse brain tissue slices**

- 773 A) Mouse brain tissue (cortex) expanded using TREx, stained for total protein content with BODIPY-FL  
774 NHS, and imaged by confocal microscopy. Displayed contrast is inverted to show dense stained regions as  
775 dark. Inset, zoom-in showing nuclear envelope with densely stained structures spanning the nuclear  
776 envelope, consistent with nuclear pore complexes.
- 777 B) Mouse brain tissue (cortex) stained with antibodies against homer (magenta), bassoon (yellow), and  
778 VGAT (blue), and DAPI (grey), and expanded using TREx.
- 779 C) Volumetrically rendered zoom-in of white box in (A) showing paired Bassoon- and Homer-rich  
780 structures, consistent with excitatory synapses. Depending on the orientation, clear separation of Bassoon  
781 and Homer can be observed, as well as a complex, structured pre-synaptic vesicle pool marked by VGAT  
782 bearing several release sites marked by Bassoon.
- 783 D) Quantification of Bassoon and Homer separation (mean  $\pm$  S.D. plotted, n=538 synapses, 1 replicate).
- 784 Scale bars (corrected to indicate pre-expansion dimensions): main  $\sim$ 2  $\mu$ m, zooms  $\sim$ 400 nm

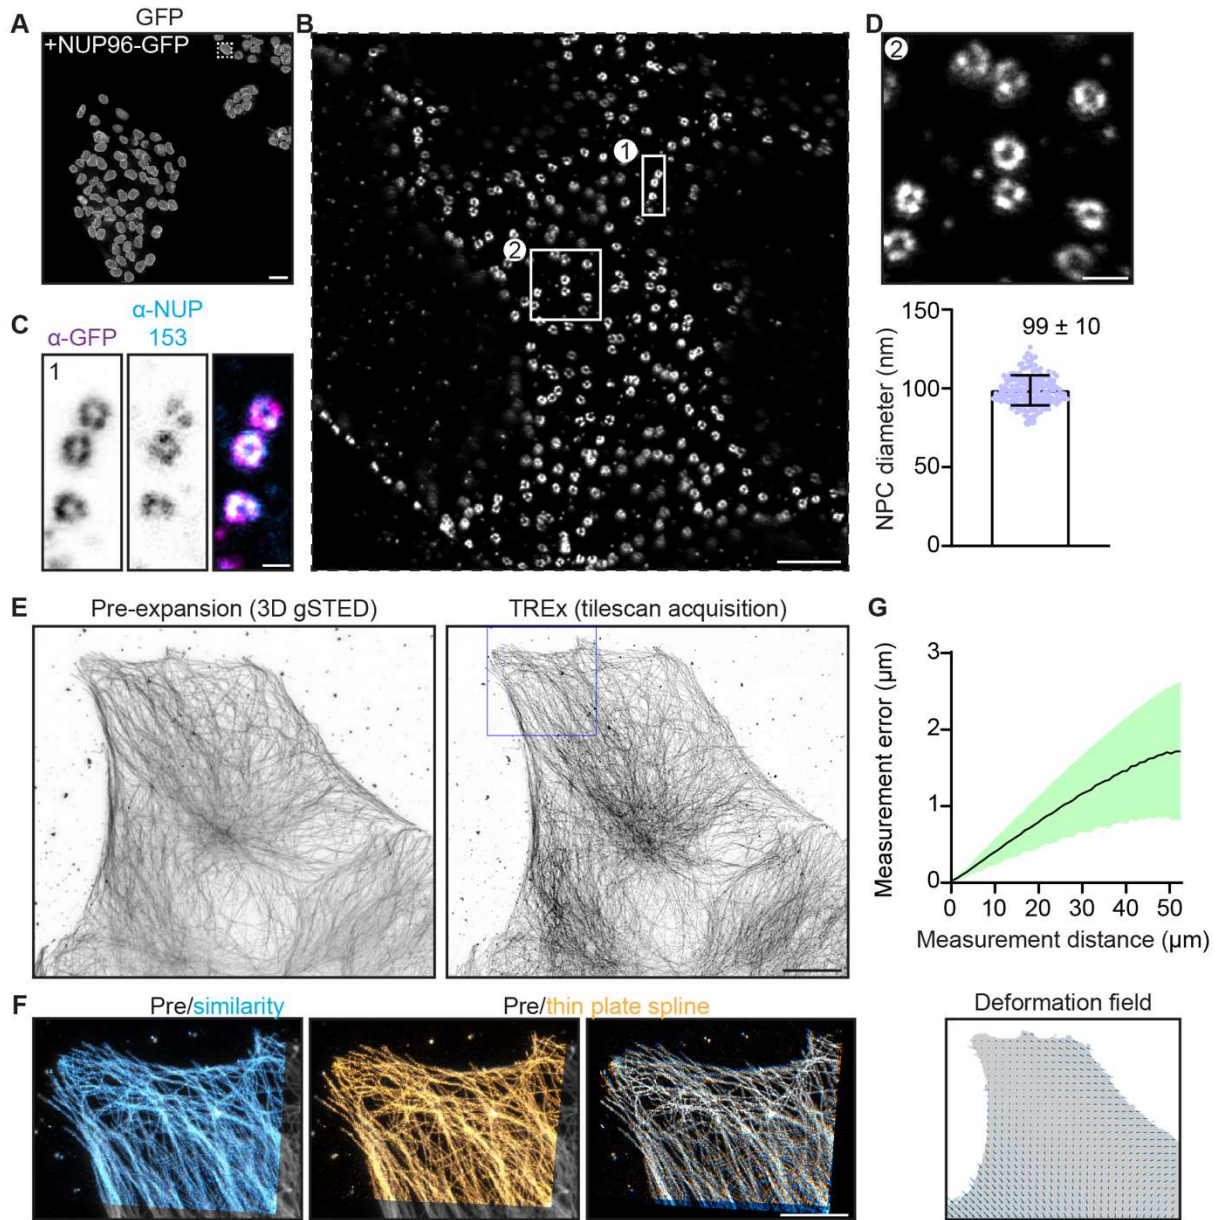

785

786 **FIGURE 3: Characterization of expansion isotropy using TREx**

787 A) U2OS knock-in cells with homozygous NUP96-GFP, amplified with anti-GFP antibodies.

788 B) One nucleus from boxed region of (A), imaged by confocal microscopy after TREx.

789 C) High-resolution view of several nuclear pores from boxed region (1) of panel (B), showing both anti-  
790 GFP (magenta) and anti-NUP153 (endogenous nuclear pore protein, cyan) staining.



791 D) High-resolution view of several nuclear pores from boxed region (2) of panel (B) (top). Distribution of  
792 diameters of individual nuclear pores (bottom), corrected for the macroscopic expansion factor of 9.5x.  
793 N=60 NPCs from 3 spatially separated cells.

794 E) Maximum projection of pre-expansion 3D gSTED acquisition (left) and maximum projection of tilescan  
795 acquisition (42 tiles, post expansion size ~750x650 um) of the same cell post-expansion (right).

796 F) Post expansion single field of view, as indicated with magenta box in (D), aligned with the pre-expansion  
797 image (grey) by similarity transformation (cyan) or thin plate spline elastic transformation (orange). Right  
798 shows overlay of similarity and elastic transformation to illustrate local deformations.

799 G) Quantification of measurement errors of the stitched dataset due to non-uniform expansion. Mean error  
800 for a given measurement length (black line)  $\pm$  S.D. (shaded region). The residual elastic deformation field  
801 is shown below.

802 Scale bars: A ~1  $\mu$ m, B ~50  $\mu$ m, C ~100 nm, D ~200 nm, E ~10  $\mu$ m, F ~5  $\mu$ m.

803

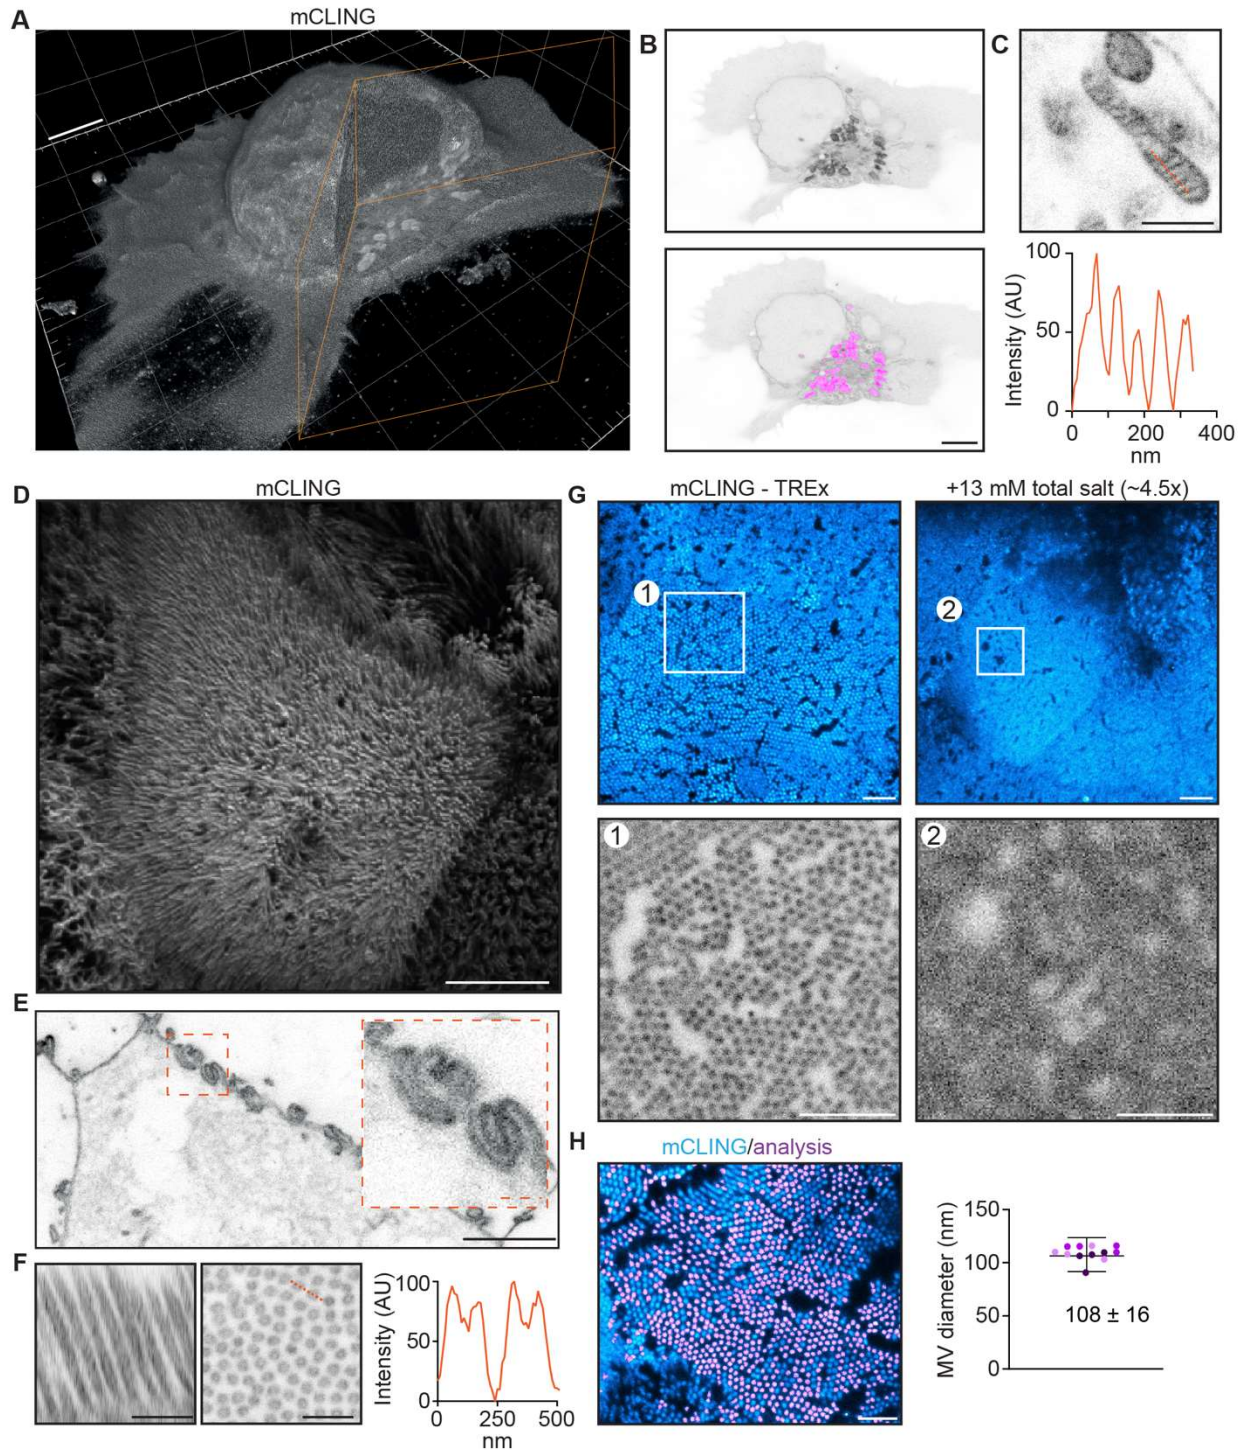

804

805 **FIGURE 4: TReX can be used to visualize the ultrastructure of cellular membranes**

806 A) Volumetric render of Jurkat T cell activated on anti-CD3 coated coverslip fixed and stained using

807 mCLING. Colored clipping planes indicate portion clipped out to reveal intracellular detail.

808 B) Immunological synapse of activated T cell in (A) revealing organelle clustering at the immunological  
809 synapse. Below: mitochondria segmented using the trainable Weka segmentation algorithm indicated in  
810 magenta.

811 C) Representative example of mitochondrion in T cells visualized with mCLING. Line profile along the  
812 orange dashed line indicates mitochondrial cristae.

813 D) Depth-coded volumetric projection of Caco2 monolayer apical brush border as seen from above looking  
814 down on the cells.

815 E) Representative plane below the apical surface revealing highly interdigitated cell-cell contacts.

816 F) Resliced (left) representative zoom (right) of brush border showing microvilli as hollow protrusions.  
817 Linescan indicated in orange.

818 G) Comparison of dense brush borders after tenfold expansion in water (left) and ~4.5 times expansion in  
819 13 mM salt (right, see Fig. 4—supp. fig. 1). Single plane of brush border and plane of same cell below the  
820 apical surface shown in cyan. Zooms 1, 2 correspond to areas of the same size corrected for the expansion  
821 factor to illustrate the increase in resolution of tenfold expansion.

822 H) Quantification of microvilli diameter by determining the area of cross-sectioned (left). Plotted mean  $\pm$   
823 S.D. ( $107.7 \pm 16.1$  nm) of 12,339 microvilli with means of individual cells color coded per replicate  
824 overlaid (4 cells per replicate, N=3).

825 Scale bars (corrected to indicate pre-expansion dimensions): A, B, D, E (main)  $\sim 2$   $\mu$ m, C, E (zoom), F  $\sim 500$   
826 nm, G and H  $\sim 1$   $\mu$ m.

827

828

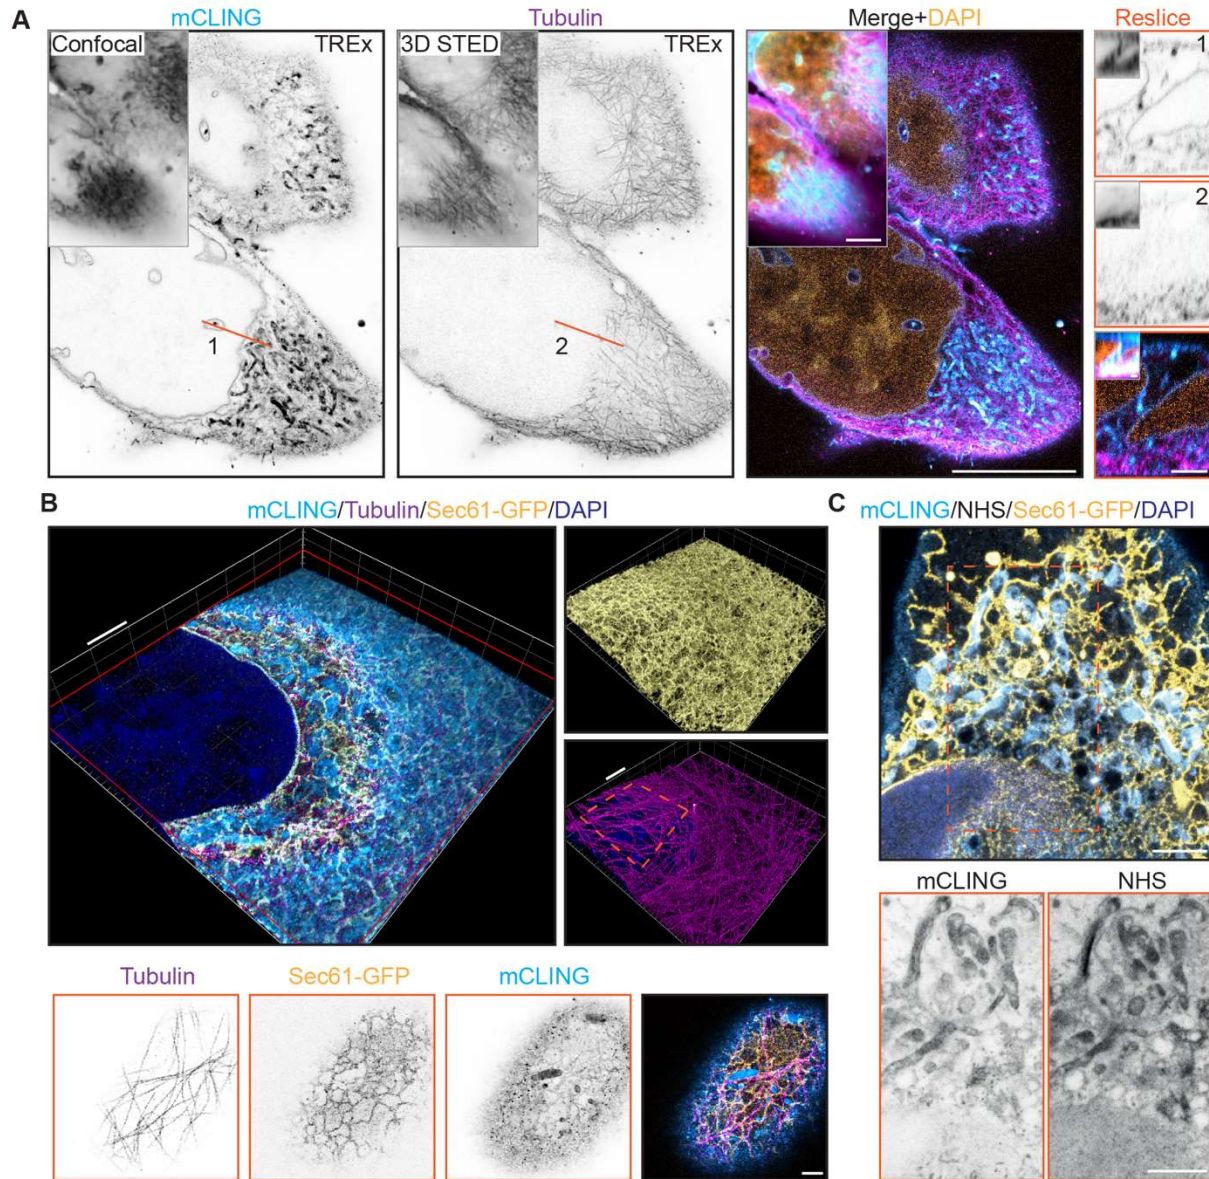

829

830 **FIGURE 5: TREx Microscopy can combine antibody-based staining with NHS ester total protein**  
 831 **stain to provide subcellular context**

832 A) Single and merged planes of expanded U2OS cell stained for mCLING, tubulin and DAPI, grey outlined  
 833 inserts show similar confocal and 3D STED acquisitions pre-expansion, for mCLING and tubulin  
 834 respectively. Single planes of mCLING and tubulin are displayed in inverted contrast. Orange line (1,2)  
 835 correspond to reslices (left) with inserts showing similar resliced planes pre-expansion.

836 B) Volumetric render of U2OS cell expressing GFP-Sec61 $\beta$  stained for mCLING, GFP and tubulin. Top  
 837 portion of cell is clipped with clipping plane indicated in red. Volumetric render of entire volume for GFP

838 and tubulin in insert A and B, respectively. Single planes displayed in inverted contrast of the top of cell in  
839 B revealing the tight spatial organization below.

840 C) Merged plane of expanded U2OS cell expressing GFP-Sec61 $\beta$  stained for mCLING, GFP, NHS ester  
841 and DAPI. Single planes of mCLING and NHS ester are displayed in inverted contrast.

842 Scale bars (corrected to indicate pre-expansion dimensions): A (main)  $\sim 5 \mu\text{m}$ , B (renders)  $\sim 2 \mu\text{m}$ , A  
843 (reslices), B (single planes, below), C  $\sim 1 \mu\text{m}$ .

844

845

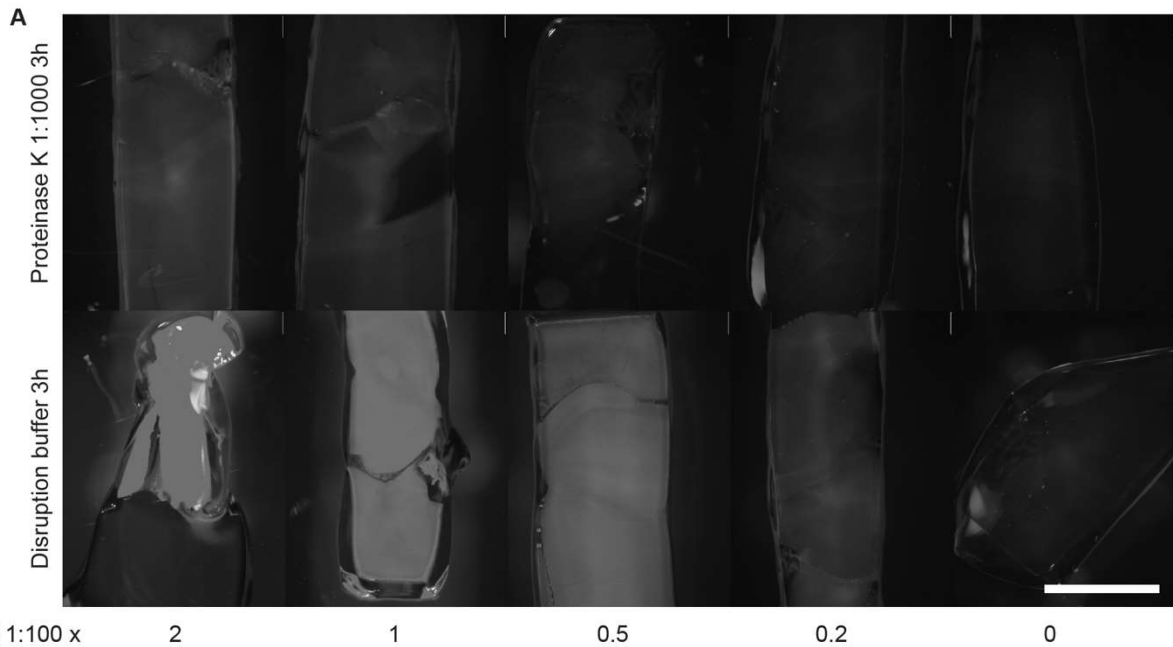

846

847 **FIGURE 2—FIGURE SUPPLEMENT 1: Comparison of anchoring and disruption conditions**

848 A) Mouse brain tissue samples anchored with varying amounts of acryloyl-X SE (AcX), stained with NHS  
849 ester dye, and disrupted with two methods: proteinase K diluted 1:1000 into PBS and applied at room  
850 temperature (top row) or denaturing disruption buffer applied at 80 °C (bottom row) for 3 hours. AcX was  
851 diluted from a 10 g/L stock to 200, 100, 50, 20, and 0 mg/L (from left to right) into PBS and applied for 1  
852 hour.

853

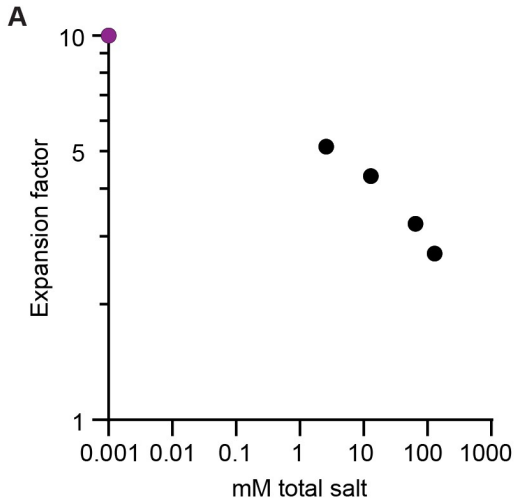

854

855 **FIGURE 4—FIGURE SUPPLEMENT 1: Expansion factor versus ionic strength**

856 A) Expansion factor of TReX gel without biological sample as a function of ionic strength. Black dots are  
857 measured values with mM total salt being derived from dilutions of PBS (factor 1, 0.5, 0.1, 0.02 of PBS).  
858 The magenta dot represents 10x expansion in water in equilibrium with atmospheric CO<sub>2</sub>. Assuming each  
859 H<sup>+</sup> corresponds to one HCO<sub>3</sub><sup>-</sup> ion, the measured pH of water in equilibrium with room air of 6 implies an  
860 ionic strength of 10<sup>-6</sup>, or 1 μM.

861

862

863 **SUPPLEMENTAL MOVIES**

864 **FIGURE 2—Supplemental Movie 1: Z-stack of Fig. 2A**

865 **FIGURE 2—Supplemental Movie 2: 3D render of Fig. 2B**

866 **FIGURE 4—Supplemental Movie 1: 3D render of Fig. 4A**

867 **FIGURE 4—Supplemental Movie 2: 3D render of Fig. 4D**

868 **FIGURE 5—Supplemental Movie 1: 3D render of Fig. 5B**
